# Supplementary material
Source: MDPI journal article supplement (https://www.mdpi.com/2304-6740/11/10/384)
Supplement: s1 [file s1]

# Revealing the Minimum Energy Pathways for Formamide Hydrogenation Reactions in the Presence of Platinum–Vanadium Clusters: A Quantum Chemical DFT/Nudged Elastic Band Study

Natalia S. Panina<sup>1,\*†</sup>, Ilya N. Klyukin<sup>2,†</sup>, Tatyana M. Buslaeva<sup>3,†</sup>, and Andrei I. Fischer<sup>1,†</sup>

- 1 St. Petersburg State Institute of Technology (Technical University), 26 Moskovsky pr., 190013 St. Petersburg, Russia;
- 2 Kurnakov Institute of General and Inorganic Chemistry, Russian Academy of Sciences, Leninskii pr. 31, 117907, Moscow, Russia;
- 3 MIREA – Russian Technological University (Lomonosov Institute of Fine Chemical Technologies), 86 Vernadsky Ave;

† These authors contributed equally to this work.

\* Correspondence: nataliepanina2707@gmail.com

## Nudged Elastic Band Method

In elastic band methods finite number of images of the system are connected together to give a discreet representation of a path on the PES. The images are connected with springs and the object function is defined as

$$S(\mathbf{R}_1, \mathbf{R}_2, \dots, \mathbf{R}_n) = \sum_{i=0}^{n+1} E(\mathbf{R}_i) + \sum_{i=1}^{n+1} \frac{k}{2} \|\mathbf{R}_i - \mathbf{R}_{i-1}\|^2$$

where  $\mathbf{R}_0$  and  $\mathbf{R}_{n+1}$  represent positions of reagents and products. A spring interaction between adjacent images prevents them to move far away from the path and ensures path continuity.  $E(\mathbf{R}_i)$  is the electronic energy of the  $i$ -th image and is a subject to the standard minimization routine in the frameworks of some quantum chemical or MM method. An important feature of the NEB method which distinguishes it from other elastic band methods [61-63] is the use of such a projection of the object function gradient that spring forces act along the path whereas true forces act in the directions perpendicular to the local tangent vectors. Such algorithm ensures that spring forces do not hinder to the convergence of elastic band to MEP. In general, many MEPs may exist between the chosen reagents and products. The minimization technique used in ORCA package will likely converge to the MEP closest to the initial guess. NEB method exists in several versions: NEB, NEB-CI, NEB-TS.

The construction of MEP curves by the NEB method in the case of complex molecular processes involving multi-electron systems is a time-consuming technical task. Often, due to a

small given number of images, some TSs may be missed, and if their number is large, there may be repeated images of TSs, between which false minima appear. In addition, if a conformational rearrangement of the system becomes necessary on the reaction pathway, false TSs with high barriers may appear, corresponding to the breaking of some bonds with the rearrangement and the subsequent formation of former bonds. Such unreliable MEPs often can be improved by increasing the number of images.

The first obtained MEP curve which connects reagents and products should only be considered as a starting point for further analysis. This MEP should then be thoroughly analysed, with mandatory re-optimisation of all significant critical points. In complex cases, obtaining optimised geometries of all images is rarely achieved. Usually, the NEB method works well when there are only a few critical points between the reagent and the product. In other cases, it is necessary to partition the initial MEP into several sections, each preferably including one or two TSs, and to apply the NEB method to each section, with subsequent refinement of all critical points. All optimised sections of the MEP should be stitched together to produce a final overall MEP.

**Table S1.** Cartesian coordinates of compounds and their absolute energy characteristics  $E_{\text{el}}+ZPE$  and  $G^0$  (298.15 K, 1.00 atm.) for critical points (minima and transition states) of MEP curves of reaction (1)

| N <sup>o</sup> |                                                                                                                                         | x                                                                                                                                                                               | y                                                                                                                                                            | z                                                                                                                                                     | $E_{\text{el}}+ZPE$ (Eh) | $G^0$ (Eh)    |
|----------------|-----------------------------------------------------------------------------------------------------------------------------------------|---------------------------------------------------------------------------------------------------------------------------------------------------------------------------------|--------------------------------------------------------------------------------------------------------------------------------------------------------------|-------------------------------------------------------------------------------------------------------------------------------------------------------|--------------------------|---------------|
| 1              | HCONH <sub>2</sub><br>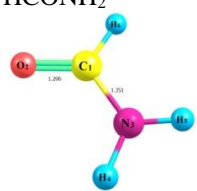                                 | C -1.618563000<br>O -1.318776000<br>N -0.740693000<br>H 0.245234000<br>H -1.053605000<br>H -2.668478000                                                                         | -5.625411000<br>-4.533655000<br>-6.564245000<br>-6.364814000<br>-7.455742000<br>-5.967342000                                                                 | 0.438205000<br>0.022906000<br>0.854347000<br>0.826662000<br>1.191856000<br>0.518499000                                                                | -169.73162324            | -169.75611381 |
| 2              | reagent I<br>{H <sub>2</sub> +HCONH <sub>2</sub> }<br> | C -1.161411000<br>O -0.463109000<br>N -0.772403000<br>H 0.164952000<br>H -1.399638000<br>H -2.210205000<br>H -2.172119000<br>H -2.823093000                                     | -5.990544000<br>-5.304219000<br>-6.542144000<br>-6.386666000<br>-7.105577000<br>-6.234283000<br>-4.855423000<br>-4.878319000                                 | 0.258067000<br>-0.448068000<br>1.426759000<br>1.757556000<br>1.970458000<br>0.002400000<br>-2.263384000<br>-2.632536000                               | -170.88914588            | -170.91697493 |
| 3              | TS1<br>( $\nu = 2267i \text{ cm}^{-1}$ )<br>          | C -0.164668000<br>O 0.611030000<br>N 0.391957000<br>H 1.353889000<br>H -0.169756000<br>H -1.198521000<br>H -0.753679000<br>H -0.070252000                                       | 0.323779000<br>1.228648000<br>-0.648260000<br>-0.881638000<br>-1.290091000<br>0.537180000<br>-0.070293000<br>0.800674000                                     | 0.103388000<br>-0.449578000<br>0.814346000<br>0.630099000<br>1.346087000<br>0.378900000<br>-1.469990000<br>-1.353252000                               | -170.78205729            | -170.80707851 |
| 4              | product I –<br>HOCH <sub>2</sub> NH <sub>2</sub><br> | C -1.549525000<br>O -1.182165000<br>N -0.604127000<br>H 0.241679000<br>H -0.995402000<br>H -2.538474000<br>H -1.620415000<br>H -0.930622000                                     | -5.805373000<br>-4.464515000<br>-6.473419000<br>-6.725203000<br>-7.304017000<br>-5.891563000<br>-6.220027000<br>-4.135102000                                 | 0.169563000<br>-0.013771000<br>1.027351000<br>0.533028000<br>1.449302000<br>0.641033000<br>-0.843500000<br>0.855563000                                | -170.88926191            | -170.91441307 |
| 5              | reagent II –<br>{H <sub>2</sub> +HOCH <sub>2</sub> NH}                                                                                  | C -1.292845000<br>O -1.158481000<br>N -0.386932000<br>H 0.556313000<br>H -0.685766000<br>H -2.310200000<br>H -1.124379000<br>H -1.094939000<br>H -4.381961000<br>H -3.642666000 | -6.183261000<br>-4.803927000<br>-6.613562000<br>-6.729427000<br>-7.476485000<br>-6.439400000<br>-6.646942000<br>-4.397805000<br>-3.976469000<br>-4.089323000 | 0.268649000<br>0.044074000<br>1.302158000<br>0.956073000<br>1.734244000<br>0.595225000<br>-0.710826000<br>0.915463000<br>-0.404673000<br>-0.416234000 | -172.04755813            | -172.07627259 |
| 6              | TS2<br>( $\nu = 542i \text{ cm}^{-1}$ )<br>          | C 0.487656000<br>O -1.457586000<br>N 0.725755000<br>H 1.341447000                                                                                                               | -0.496628000<br>0.665451000<br>-1.175279000<br>-0.767091000                                                                                                  | -0.603142000<br>0.073741000<br>0.479116000<br>1.168064000                                                                                             | -171.9376478             | -171.96468770 |

|   |                                                                                                                                                          |                                                                                                                                                                                                                                                                                                                                                                                                                                     |               |               |
|---|----------------------------------------------------------------------------------------------------------------------------------------------------------|-------------------------------------------------------------------------------------------------------------------------------------------------------------------------------------------------------------------------------------------------------------------------------------------------------------------------------------------------------------------------------------------------------------------------------------|---------------|---------------|
|   | 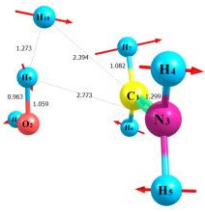                                                                        | H 0.079665000 -1.876598000 0.800791000<br>H -0.267384000 -0.857774000 -1.283867000<br>H 1.119517000 0.352524000 -0.829270000<br>H -2.019741000 1.223512000 -0.473762000<br>H -0.602662000 1.251144000 0.287408000<br>H 0.593333000 1.680738000 0.380921000                                                                                                                                                                          |               |               |
| 7 | <p>product II –<br/>H<sub>2</sub>O···NH<sub>2</sub> CH<sub>3</sub></p>  | C 1.022152000 -0.155398000 -0.685129000<br>O -2.008310000 1.091072000 0.109328000<br>N 0.301722000 -0.555932000 0.518684000<br>H 0.857140000 -0.374814000 1.345260000<br>H 0.106953000 -1.549162000 0.505241000<br>H 0.395886000 -0.349034000 -1.557157000<br>H 1.983086000 -0.664303000 -0.828438000<br>H -2.583876000 1.141199000 0.873807000<br>H -1.277085000 0.496331000 0.371105000<br>H 1.202332000 0.920042000 -0.652699000 | -172.07848258 | -172.10743269 |

**Table S2.** Cartesian coordinates of compounds and their energy characteristics (298.15 K, 1.00 atm) for critical points (minima and transition states) of MEP curves of reaction (2)

| N <sup>o</sup> |                                                                                                                                                                                     | x                                                                                                                                                                                                                  | y                                                                                                                                                                                            | z                                                                                                                                                                                     | $E_{el} + ZPE$ (Eh) | $G^0$ (Eh)    |
|----------------|-------------------------------------------------------------------------------------------------------------------------------------------------------------------------------------|--------------------------------------------------------------------------------------------------------------------------------------------------------------------------------------------------------------------|----------------------------------------------------------------------------------------------------------------------------------------------------------------------------------------------|---------------------------------------------------------------------------------------------------------------------------------------------------------------------------------------|---------------------|---------------|
| 1              | Pt4 triplet<br>                                                                                    | Pt 0.875935000<br>Pt 0.887334000<br>Pt -0.886662000<br>Pt -0.876607000                                                                                                                                             | -0.967007000<br>0.966706000<br>0.899704000<br>-0.899404000                                                                                                                                   | -0.962692000<br>0.952412000<br>-0.903515000<br>0.913796000                                                                                                                            | -477.34495741       | -477.38354486 |
| 2              | {Pt <sub>3</sub> Pt <sub>(3)</sub> (H) <sub>2</sub> }<br>                                          | Pt 0.930468000<br>Pt 0.867866000<br>Pt -0.797037000<br>Pt -0.965520000<br>H -1.780087000<br>H -0.343962000                                                                                                         | -1.115225000<br>0.996536000<br>0.910647000<br>-0.758971000<br>2.103704000<br>1.833641000                                                                                                     | -0.718875000<br>0.700521000<br>-1.254812000<br>0.881213000<br>-1.200266000<br>-2.410737000                                                                                            | -478.55965765       | -478.59864777 |
| 3              | Pt <sub>3</sub> Pt <sub>(10)</sub> —OC(H)NH <sub>2</sub> }<br>                                    | C -0.869782000<br>O 0.210563000<br>N -0.999980000<br>H -0.192693000<br>H -1.894866000<br>H -1.789895000<br>Pt -0.973069000<br>Pt 0.646100000<br>Pt -1.486597000<br>Pt 0.375782000                                  | -5.651059000<br>-5.085120000<br>-6.761596000<br>-7.166045000<br>-7.203352000<br>-5.268756000<br>-2.946440000<br>-1.169435000<br>-1.476580000<br>-3.304646000                                 | 0.442196000<br>0.290492000<br>1.164214000<br>1.610371000<br>1.271709000<br>-0.012663000<br>-3.066157000<br>-2.219723000<br>-0.857632000<br>-0.861467000                               | -647.10710218       | -647.15131812 |
| 4              |                                                                                                  | H -2.074516000<br>H -2.155771000                                                                                                                                                                                   | 0.000000000<br>0.000000000                                                                                                                                                                   | -0.899512000<br>-0.158060000                                                                                                                                                          | -1.15826981         | -1.16976531   |
| 5              | reagent (a) –<br>{H <sub>2</sub> +Pt <sub>3</sub> Pt <sub>(10)</sub> —OC(H)NH <sub>2</sub> }<br> | C -1.427809000<br>O -0.779357000<br>N -2.476619000<br>H -2.763878000<br>H -2.986348000<br>H -1.168337000<br>Pt 2.193696000<br>Pt 2.828467000<br>Pt 0.679704000<br>Pt 0.874208000<br>H 7.007985000<br>H 7.519981000 | -6.412901000<br>-5.786922000<br>-7.160495000<br>-7.229758000<br>-7.663851000<br>-6.381422000<br>-5.517235000<br>-3.220264000<br>-3.577706000<br>-4.607218000<br>-0.167789000<br>-0.665676000 | 0.184245000<br>1.023303000<br>0.509522000<br>1.472611000<br>-0.193860000<br>-0.879871000<br>-1.653434000<br>-0.402587000<br>-1.985121000<br>0.401344000<br>3.206742000<br>3.446504000 | -648.25931885       | -648.30780740 |
| 6              | min1(a)<br>                                                                                      | C -1.427809000<br>O -0.779357000<br>N -2.476619000<br>H -2.763878000<br>H -2.986348000<br>H -1.168337000<br>Pt 2.193696000<br>Pt 2.828467000<br>Pt 0.679704000<br>Pt 0.874208000<br>H 2.799451000                  | -6.412901000<br>-5.786922000<br>-7.160495000<br>-7.229758000<br>-7.663851000<br>-6.381422000<br>-5.517235000<br>-3.220264000<br>-3.577706000<br>-4.607218000<br>-1.885534000                 | 0.184245000<br>1.023303000<br>0.509522000<br>1.472611000<br>-0.193860000<br>-0.879871000<br>-1.653434000<br>-0.402587000<br>-1.985121000<br>0.401344000<br>0.380542000                | -648.32281527       | -648.36707510 |

|    |                                                                                                                                   |                                                                   |                                                                                                                                                                                        |                                                                                                                                                                                         |                                                                                                                                                                                       |               |               |
|----|-----------------------------------------------------------------------------------------------------------------------------------|-------------------------------------------------------------------|----------------------------------------------------------------------------------------------------------------------------------------------------------------------------------------|-----------------------------------------------------------------------------------------------------------------------------------------------------------------------------------------|---------------------------------------------------------------------------------------------------------------------------------------------------------------------------------------|---------------|---------------|
|    |                                                                                                                                   | H                                                                 | 3.964326000                                                                                                                                                                            | -3.379547000                                                                                                                                                                            | 0.636236000                                                                                                                                                                           |               |               |
| 7  | TS1(a)<br>( $\nu = 90i \text{ cm}^{-1}$ )<br>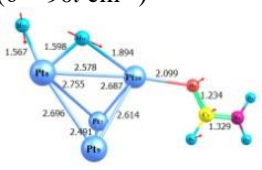    | C<br>O<br>N<br>H<br>H<br>H<br>Pt<br>Pt<br>Pt<br>Pt<br>H<br>H<br>H | -1.554946000<br>-0.831906000<br>-2.582932000<br>-2.792669000<br>-3.153584000<br>-1.382120000<br>2.428088000<br>2.715281000<br>0.650318000<br>0.832318000<br>1.809824000<br>3.862328000 | -1.033668000<br>-0.481722000<br>-1.797914000<br>-1.941521000<br>-2.240789000<br>-0.918928000<br>-0.312570000<br>2.166400000<br>1.359303000<br>0.649821000<br>2.096940000<br>2.454650000 | 0.233472000<br>1.065175000<br>0.583802000<br>1.558583000<br>-0.113527000<br>-0.842645000<br>-1.549201000<br>-0.559818000<br>-2.068048000<br>0.434058000<br>0.794587000<br>0.463562000 | -648.30190879 | -648.34556610 |
| 8  | min2(a)<br>                                      | C<br>O<br>N<br>H<br>H<br>H<br>Pt<br>Pt<br>Pt<br>Pt<br>H<br>H<br>H | -1.515682000<br>-0.393341000<br>-2.585325000<br>-2.490539000<br>-3.489444000<br>-1.697391000<br>3.470220000<br>2.033209000<br>1.281999000<br>1.314577000<br>1.425830000<br>2.645887000 | -0.919250000<br>-1.414700000<br>-1.472423000<br>-2.325691000<br>-1.044403000<br>0.010097000<br>0.437383000<br>2.286060000<br>0.921373000<br>-0.495541000<br>1.028458000<br>2.988637000  | 0.304571000<br>0.388615000<br>0.868881000<br>1.395549000<br>0.783976000<br>-0.245382000<br>-1.460248000<br>-0.364530000<br>-2.598714000<br>-0.447431000<br>0.474193000<br>0.900520000 | -648.31378768 | -648.35832012 |
| 9  | TS2(a)<br>( $\nu = 665i \text{ cm}^{-1}$ )<br>  | C<br>O<br>N<br>H<br>H<br>H<br>Pt<br>Pt<br>Pt<br>Pt<br>H<br>H<br>H | -1.605508000<br>-0.591167000<br>-2.591425000<br>-2.517300000<br>-3.404840000<br>-1.749314000<br>2.974423000<br>2.707404000<br>0.924517000<br>1.012624000<br>1.171076000<br>3.669510000 | -0.959547000<br>-0.726592000<br>-1.722391000<br>-2.137360000<br>-1.905706000<br>-0.549301000<br>-0.105352000<br>2.183255000<br>1.193856000<br>0.448564000<br>1.888150000<br>2.392422000 | 0.250248000<br>0.906731000<br>0.711883000<br>1.626823000<br>0.152823000<br>-0.755218000<br>-1.719259000<br>-0.539837000<br>-2.311062000<br>0.188653000<br>0.817229000<br>0.670984000  | -648.29908909 | -648.34345837 |
| 10 | min3(a)<br>                                    | C<br>O<br>N<br>H<br>H<br>H<br>Pt<br>Pt<br>Pt<br>Pt<br>H<br>H<br>H | -1.345890000<br>-0.681370000<br>-2.400926000<br>-2.683312000<br>-2.927742000<br>-1.094256000<br>2.256234000<br>2.850480000<br>0.577052000<br>0.960013000<br>0.539365000<br>3.950350000 | -0.961070000<br>-0.321362000<br>-1.683994000<br>-1.713512000<br>-2.197244000<br>-0.961640000<br>-0.343306000<br>1.982889000<br>1.445923000<br>0.836506000<br>1.943183000<br>1.973625000 | 0.226680000<br>1.042804000<br>0.585076000<br>1.551681000<br>-0.098013000<br>-0.840324000<br>-1.701567000<br>-0.736357000<br>-2.141824000<br>0.367945000<br>1.374066000<br>0.369830000 | -648.31336605 | -648.35718620 |
| 11 | TS3(a)<br>( $\nu = 486i \text{ cm}^{-1}$ )<br> | C<br>O<br>N<br>H<br>H<br>H<br>Pt<br>Pt<br>Pt<br>Pt<br>H<br>H<br>H | -1.217064000<br>-0.538130000<br>-2.286876000<br>-2.568013000<br>-2.827873000<br>-0.965133000<br>2.180007000<br>3.002360000<br>0.469100000<br>1.114892000<br>0.735938000<br>2.900791000 | -0.891615000<br>-0.264725000<br>-1.588655000<br>-1.609032000<br>-2.089464000<br>-0.893747000<br>-0.400189000<br>1.911781000<br>1.374568000<br>0.862839000<br>1.918180000<br>1.670061000 | 0.211851000<br>1.029512000<br>0.576454000<br>1.543665000<br>-0.104755000<br>-0.854949000<br>-1.770486000<br>-0.948109000<br>-2.149706000<br>0.379866000<br>1.456876000<br>0.629782000 | -648.29644351 | -648.34022424 |

|    |                                                                                                                                  |    |              |              |              |               |               |
|----|----------------------------------------------------------------------------------------------------------------------------------|----|--------------|--------------|--------------|---------------|---------------|
| 12 | min4(a)<br>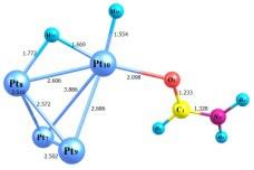                                     | C  | -1.267130000 | -0.802464000 | 0.290246000  | -648.30275109 | -648.34722432 |
|    |                                                                                                                                  | O  | -0.881504000 | 0.142590000  | 0.981318000  |               |               |
|    |                                                                                                                                  | N  | -2.345229000 | -1.512990000 | 0.602082000  |               |               |
|    |                                                                                                                                  | H  | -2.869293000 | -1.291963000 | 1.433532000  |               |               |
|    |                                                                                                                                  | H  | -2.643181000 | -2.273997000 | 0.019277000  |               |               |
|    |                                                                                                                                  | H  | -0.738288000 | -1.094748000 | -0.625107000 |               |               |
|    |                                                                                                                                  | Pt | 2.734060000  | -0.208362000 | -2.672941000 |               |               |
|    |                                                                                                                                  | Pt | 2.883321000  | 1.734771000  | -1.082371000 |               |               |
|    |                                                                                                                                  | Pt | 0.640870000  | 1.056924000  | -2.144947000 |               |               |
|    |                                                                                                                                  | Pt | 0.938893000  | 1.079876000  | 0.524258000  |               |               |
|    |                                                                                                                                  | H  | 1.099484000  | 1.386127000  | 2.039651000  |               |               |
|    |                                                                                                                                  | H  | 2.447996000  | 1.784235000  | 0.635002000  |               |               |
|    |                                                                                                                                  | C  | -1.215665000 | -0.798692000 | 0.192301000  |               |               |
|    |                                                                                                                                  | O  | -0.543282000 | -0.186791000 | 1.017515000  |               |               |
| 13 | TS4(a)<br>( $\nu = 319i\text{ cm}^{-1}$ )<br>   | C  | -1.215665000 | -0.798692000 | 0.192301000  | -648.2958571  | -648.34017570 |
|    |                                                                                                                                  | O  | -0.543282000 | -0.186791000 | 1.017515000  |               |               |
|    |                                                                                                                                  | N  | -2.285931000 | -1.515828000 | 0.528363000  |               |               |
|    |                                                                                                                                  | H  | -2.568694000 | -1.569859000 | 1.493624000  |               |               |
|    |                                                                                                                                  | H  | -2.808894000 | -2.016014000 | -0.167298000 |               |               |
|    |                                                                                                                                  | H  | -0.962322000 | -0.786304000 | -0.876241000 |               |               |
|    |                                                                                                                                  | Pt | 2.100497000  | -0.719193000 | -1.686158000 |               |               |
|    |                                                                                                                                  | Pt | 3.047466000  | 1.620530000  | -1.194646000 |               |               |
|    |                                                                                                                                  | Pt | 0.730544000  | 1.287261000  | -2.276057000 |               |               |
|    |                                                                                                                                  | Pt | 1.164571000  | 1.096880000  | 0.405530000  |               |               |
|    |                                                                                                                                  | H  | 1.680353000  | 1.059972000  | 1.869552000  |               |               |
|    |                                                                                                                                  | H  | 1.661356000  | 2.528038000  | 0.693515000  |               |               |
|    |                                                                                                                                  | C  | -1.188462000 | -0.796716000 | 0.237618000  |               |               |
|    |                                                                                                                                  | O  | -0.582812000 | -0.018506000 | 0.968224000  |               |               |
| 14 | min5(a)<br>                                    | N  | -2.300489000 | -1.422818000 | 0.620066000  | -648.30231564 | -648.34648548 |
|    |                                                                                                                                  | H  | -2.671202000 | -1.263518000 | 1.542810000  |               |               |
|    |                                                                                                                                  | H  | -2.774035000 | -2.054519000 | 0.000337000  |               |               |
|    |                                                                                                                                  | H  | -0.842214000 | -1.018920000 | -0.779342000 |               |               |
|    |                                                                                                                                  | Pt | 2.204481000  | -0.575698000 | -1.779578000 |               |               |
|    |                                                                                                                                  | Pt | 3.122358000  | 1.793033000  | -1.205466000 |               |               |
|    |                                                                                                                                  | Pt | 0.856200000  | 1.403908000  | -2.427907000 |               |               |
|    |                                                                                                                                  | Pt | 1.248200000  | 0.981435000  | 0.209278000  |               |               |
|    |                                                                                                                                  | H  | 1.977346000  | 0.735740000  | 1.551101000  |               |               |
|    |                                                                                                                                  | H  | 0.950628000  | 2.236579000  | 1.062858000  |               |               |
|    |                                                                                                                                  | C  | -0.887978000 | -0.922758000 | 0.129368000  |               |               |
|    |                                                                                                                                  | O  | -1.217330000 | 0.122377000  | -0.630170000 |               |               |
|    |                                                                                                                                  | N  | -1.522431000 | -1.051904000 | 1.368272000  |               |               |
|    |                                                                                                                                  | H  | -2.067378000 | -0.239849000 | 1.614677000  |               |               |
| 15 | TS5(a)<br>( $\nu = 295i\text{ cm}^{-1}$ )<br> | H  | -2.003057000 | -1.922965000 | 1.519082000  | -648.25186007 | -648.29442531 |
|    |                                                                                                                                  | H  | -0.800764000 | -1.889238000 | -0.388483000 |               |               |
|    |                                                                                                                                  | Pt | 2.365881000  | 0.439219000  | -2.515605000 |               |               |
|    |                                                                                                                                  | Pt | 3.205206000  | 1.249816000  | -0.320650000 |               |               |
|    |                                                                                                                                  | Pt | 1.570050000  | 2.754361000  | -1.662593000 |               |               |
|    |                                                                                                                                  | Pt | 0.722483000  | 0.748078000  | -0.378968000 |               |               |
|    |                                                                                                                                  | H  | 0.394530000  | -0.803569000 | 0.396944000  |               |               |
|    |                                                                                                                                  | H  | 0.240788000  | 1.516432000  | 0.868127000  |               |               |
|    |                                                                                                                                  | C  | -0.509386000 | -1.139553000 | 0.759719000  |               |               |
|    |                                                                                                                                  | O  | -0.306136000 | 0.225327000  | 1.053221000  |               |               |
|    |                                                                                                                                  | N  | -1.890155000 | -1.499160000 | 0.672636000  |               |               |
|    |                                                                                                                                  | H  | -2.363653000 | -1.278624000 | 1.540285000  |               |               |
|    |                                                                                                                                  | H  | -2.346804000 | -0.974566000 | -0.063605000 |               |               |
|    |                                                                                                                                  | H  | -0.013762000 | -1.415683000 | -0.183214000 |               |               |
| 16 | min6(a)<br>                                   | Pt | 1.911768000  | 0.011683000  | -2.403223000 | -648.26867845 | -648.31255245 |
|    |                                                                                                                                  | Pt | 3.146054000  | 1.800042000  | -1.105443000 |               |               |
|    |                                                                                                                                  | Pt | 1.077544000  | 2.404471000  | -2.443281000 |               |               |
|    |                                                                                                                                  | Pt | 0.811014000  | 1.208629000  | -0.168909000 |               |               |
|    |                                                                                                                                  | H  | -0.047596000 | -1.725018000 | 1.564545000  |               |               |
|    |                                                                                                                                  | H  | 0.531111000  | 2.382452000  | 0.777268000  |               |               |

|    |                                                                                                                                                                             |                                                                                                                                                                                                                                                                                                                                                                                                                                                                                                                                                                                                                     |               |               |
|----|-----------------------------------------------------------------------------------------------------------------------------------------------------------------------------|---------------------------------------------------------------------------------------------------------------------------------------------------------------------------------------------------------------------------------------------------------------------------------------------------------------------------------------------------------------------------------------------------------------------------------------------------------------------------------------------------------------------------------------------------------------------------------------------------------------------|---------------|---------------|
| 17 | TS6(a)<br>$(\nu = 1156i \text{ cm}^{-1})$ 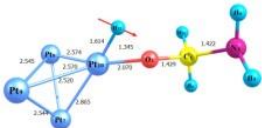                                                 | C -0.956244000 -0.874839000 0.318977000<br>O -0.242011000 0.186620000 0.950771000<br>N -1.986697000 -1.376880000 1.160412000<br>H -1.605002000 -1.737506000 2.025370000<br>H -2.657279000 -0.654515000 1.390057000<br>H -1.397989000 -0.520989000 -0.618491000<br>Pt 3.658944000 0.323405000 -1.496418000<br>Pt 2.914660000 2.718322000 -1.255654000<br>Pt 1.551156000 1.115099000 -2.684974000<br>Pt 1.247566000 1.101434000 -0.133342000<br>H -0.259287000 -1.686287000 0.087455000<br>H -0.267820000 1.406137000 0.255838000                                                                                     | -648.23647914 | -648.28027141 |
| 18 | product (a) –<br>$\{\text{Pt}_3\text{Pt}_{(10)}\text{—O(H)—CH}_2\text{N H}_2\}$            | C -0.644233000 -0.841369000 0.561895000<br>O -0.163660000 0.468694000 0.950644000<br>N -1.948033000 -1.032015000 1.081710000<br>H -1.990867000 -1.518800000 1.962839000<br>H -2.605419000 -1.413633000 0.422130000<br>H -0.654005000 -0.896392000 -0.527910000<br>Pt 2.445968000 -0.030809000 -2.250088000<br>Pt 3.566928000 2.101629000 -1.409834000<br>Pt 1.272534000 2.386995000 -2.481705000<br>Pt 1.530953000 1.238418000 -0.156896000<br>H 0.115081000 -1.522671000 0.949635000<br>H -0.925248000 1.059952000 0.897579000                                                                                     | -648.26249591 | -648.30715334 |
| 19 | reagent (c) –<br>$\{\text{H}_2+\text{Pt}_3\text{Pt}_{(4)}\text{—O(H)—CH}_2\text{NH}_2\}$  | C 0.147902000 -1.551725000 -0.216401000<br>O 0.805770000 -0.313351000 0.131137000<br>N 0.169511000 -2.422263000 0.900864000<br>H 0.941983000 -3.068720000 0.925118000<br>H -0.703585000 -2.888796000 1.081372000<br>H -0.881327000 -1.332645000 -0.506669000<br>Pt -1.508336000 2.000452000 -2.584376000<br>Pt 0.553861000 3.494525000 -2.607946000<br>Pt -0.812168000 3.490666000 -0.453755000<br>Pt 0.598334000 1.406860000 -1.161674000<br>H 0.700306000 -1.903919000 -1.090058000<br>H 0.527975000 -0.089688000 1.029299000<br>H -0.265791000 1.768631000 1.945821000<br>H -0.274437000 1.409975000 2.607265000 | -649.4204705  | -649.46832874 |
| 20 | min1(c)<br>                                                                              | C 0.118576000 -1.852088000 -0.337539000<br>O 0.820952000 -0.657643000 0.142466000<br>N 0.289569000 -2.986159000 0.468567000<br>H 1.249551000 -3.272892000 0.587088000<br>H -0.201016000 -2.965137000 1.349478000<br>H -0.940408000 -1.606253000 -0.429274000<br>Pt -1.581988000 2.072301000 -1.988341000<br>Pt 0.459164000 3.491176000 -2.031703000<br>Pt -0.657819000 3.018202000 0.364716000<br>Pt 0.624745000 1.202525000 -0.971592000<br>H 0.543208000 -2.008125000 -1.327795000<br>H 0.479462000 -0.427000000 1.015018000<br>H 0.190319000 3.541111000 1.550260000<br>H -1.394315000 2.449982000 1.608651000   | -649.48095798 | -649.52581812 |
| 21 | TS1(c)<br>$(\nu = 228i \text{ cm}^{-1})$                                                 | C -0.113726000 -1.640293000 -0.420389000<br>O 2.061859000 -0.655924000 -0.955994000<br>N -0.309894000 -1.515721000 0.848732000<br>H 0.265155000 -2.011082000 1.513103000<br>H -0.826965000 -0.683543000 1.173687000<br>H -0.751885000 -1.078127000 -1.093606000<br>Pt -1.442807000 1.857665000 -1.997472000<br>Pt 0.284962000 3.396310000 -1.104511000<br>Pt -0.908493000 1.791308000 0.615270000<br>Pt 0.805854000 0.887250000 -1.161761000                                                                                                                                                                        | -649.44953169 | -649.49369932 |



|    |                                                                                                                                  |    |              |              |              |               |               |
|----|----------------------------------------------------------------------------------------------------------------------------------|----|--------------|--------------|--------------|---------------|---------------|
|    |                                                                                                                                  | H  | 0.536246000  | -2.411154000 | -0.804928000 |               |               |
|    |                                                                                                                                  | H  | 2.455154000  | -0.614805000 | -0.078422000 |               |               |
|    |                                                                                                                                  | H  | -1.798349000 | 0.788707000  | 1.443452000  |               |               |
|    |                                                                                                                                  | H  | -0.257111000 | 1.889409000  | 2.022838000  |               |               |
| 22 | min2(c)<br>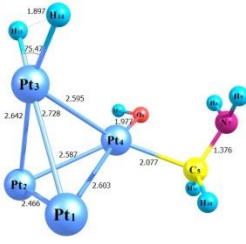                                     | C  | -0.337418000 | -1.568191000 | -0.765853000 | -649.47743304 | -649.52176321 |
|    |                                                                                                                                  | O  | 2.009905000  | -0.556783000 | 0.160550000  |               |               |
|    |                                                                                                                                  | N  | -0.291403000 | -2.154511000 | 0.478390000  |               |               |
|    |                                                                                                                                  | H  | 0.630380000  | -2.203441000 | 0.893481000  |               |               |
|    |                                                                                                                                  | H  | -1.025393000 | -1.919124000 | 1.127990000  |               |               |
|    |                                                                                                                                  | H  | -1.335102000 | -1.501248000 | -1.189749000 |               |               |
|    |                                                                                                                                  | Pt | -1.761947000 | 1.405125000  | -1.516214000 |               |               |
|    |                                                                                                                                  | Pt | 0.408888000  | 2.530082000  | -1.835536000 |               |               |
|    |                                                                                                                                  | Pt | -0.696735000 | 2.464631000  | 0.657334000  |               |               |
|    |                                                                                                                                  | Pt | 0.359670000  | 0.359008000  | -0.429790000 |               |               |
|    |                                                                                                                                  | H  | 0.408655000  | -1.957620000 | -1.456818000 |               |               |
|    |                                                                                                                                  | H  | 2.769532000  | 0.029724000  | 0.128024000  |               |               |
|    |                                                                                                                                  | H  | 0.246225000  | 3.007839000  | 1.766663000  |               |               |
|    |                                                                                                                                  | H  | -1.385257000 | 2.064512000  | 1.981528000  |               |               |
| 23 | TS2(c)<br>( $\nu = 174i\text{ cm}^{-1}$ )<br>   | C  | -0.553613000 | -1.352975000 | 0.218434000  | -649.45803541 | -649.50217880 |
|    |                                                                                                                                  | O  | 2.055438000  | -0.800957000 | -0.628981000 |               |               |
|    |                                                                                                                                  | N  | 0.394069000  | -1.656173000 | 1.040409000  |               |               |
|    |                                                                                                                                  | H  | 1.347322000  | -1.649690000 | 0.604081000  |               |               |
|    |                                                                                                                                  | H  | 0.288741000  | -1.427295000 | 2.017895000  |               |               |
|    |                                                                                                                                  | H  | -1.526345000 | -1.052292000 | 0.580728000  |               |               |
|    |                                                                                                                                  | Pt | -0.809430000 | 2.222656000  | -2.401045000 |               |               |
|    |                                                                                                                                  | Pt | 0.665230000  | 3.252533000  | -0.683142000 |               |               |
|    |                                                                                                                                  | Pt | -1.321258000 | 1.716580000  | 0.137166000  |               |               |
|    |                                                                                                                                  | Pt | 0.816004000  | 0.732177000  | -1.083467000 |               |               |
|    |                                                                                                                                  | H  | -0.415974000 | -1.578806000 | -0.830781000 |               |               |
|    |                                                                                                                                  | H  | 2.946018000  | -0.693932000 | -0.968013000 |               |               |
|    |                                                                                                                                  | H  | -1.307805000 | 1.480065000  | 1.680164000  |               |               |
|    |                                                                                                                                  | H  | -2.578397000 | 0.808108000  | 0.316553000  |               |               |
| 24 | min3(c)<br>                                   | C  | -1.049004000 | -1.061253000 | 0.741252000  | -649.46612059 | -649.51103927 |
|    |                                                                                                                                  | O  | 3.205175000  | 0.542602000  | 0.364223000  |               |               |
|    |                                                                                                                                  | N  | -0.511037000 | -1.995852000 | -0.170821000 |               |               |
|    |                                                                                                                                  | H  | 0.284633000  | -1.625591000 | -0.674397000 |               |               |
|    |                                                                                                                                  | H  | -1.188769000 | -2.352028000 | -0.828965000 |               |               |
|    |                                                                                                                                  | H  | -1.863319000 | -1.488336000 | 1.332605000  |               |               |
|    |                                                                                                                                  | Pt | 0.248643000  | 1.142876000  | -2.620789000 |               |               |
|    |                                                                                                                                  | Pt | 0.151224000  | 3.279363000  | -1.291758000 |               |               |
|    |                                                                                                                                  | Pt | -0.808473000 | 1.270336000  | -0.172921000 |               |               |
|    |                                                                                                                                  | Pt | 1.795575000  | 1.395427000  | -0.611361000 |               |               |
|    |                                                                                                                                  | H  | -0.299421000 | -0.681784000 | 1.429717000  |               |               |
|    |                                                                                                                                  | H  | 2.944944000  | -0.091879000 | 1.036596000  |               |               |
|    |                                                                                                                                  | H  | -1.203080000 | 1.852060000  | 1.215347000  |               |               |
|    |                                                                                                                                  | H  | -1.707091000 | -0.185942000 | 0.251272000  |               |               |
| 25 | TS3(c)<br>( $\nu = 121i\text{ cm}^{-1}$ )<br> | C  | -1.328318000 | -1.924860000 | 0.679389000  | -649.45647562 | -649.50163974 |
|    |                                                                                                                                  | O  | 2.279502000  | -0.070529000 | 0.589461000  |               |               |
|    |                                                                                                                                  | N  | -0.359002000 | -1.405855000 | -0.271186000 |               |               |
|    |                                                                                                                                  | H  | 0.593747000  | -1.509887000 | 0.062882000  |               |               |
|    |                                                                                                                                  | H  | -0.419476000 | -1.886796000 | -1.159197000 |               |               |
|    |                                                                                                                                  | H  | -1.231198000 | -3.000243000 | 0.879971000  |               |               |
|    |                                                                                                                                  | Pt | -0.320290000 | 1.289611000  | -2.111413000 |               |               |
|    |                                                                                                                                  | Pt | 1.366606000  | 3.157646000  | -1.694299000 |               |               |
|    |                                                                                                                                  | Pt | -0.721466000 | 3.110915000  | -0.218584000 |               |               |
|    |                                                                                                                                  | Pt | 0.986560000  | 1.240435000  | -0.001096000 |               |               |
|    |                                                                                                                                  | H  | -1.222644000 | -1.394961000 | 1.627056000  |               |               |
|    |                                                                                                                                  | H  | 3.179320000  | 0.097776000  | 0.297847000  |               |               |
|    |                                                                                                                                  | H  | -0.463520000 | 4.035354000  | 1.005577000  |               |               |
|    |                                                                                                                                  | H  | -2.339821000 | -1.738607000 | 0.313591000  |               |               |

|    |                                                                                                                                   |                                                                             |                                                                                                                                                                                                                        |                                                                                                                                                                                                                        |                                                                                                                                                                                                                      |               |               |
|----|-----------------------------------------------------------------------------------------------------------------------------------|-----------------------------------------------------------------------------|------------------------------------------------------------------------------------------------------------------------------------------------------------------------------------------------------------------------|------------------------------------------------------------------------------------------------------------------------------------------------------------------------------------------------------------------------|----------------------------------------------------------------------------------------------------------------------------------------------------------------------------------------------------------------------|---------------|---------------|
| 26 | min4(c)<br>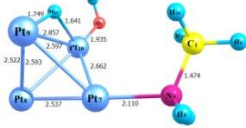                                      | C<br>O<br>N<br>H<br>H<br>H<br>Pt<br>Pt<br>Pt<br>Pt<br>H<br>H<br>H<br>H<br>H | -0.858813000<br>3.329599000<br>-1.082650000<br>-0.633625000<br>-2.074955000<br>-1.227958000<br>-0.362209000<br>0.593344000<br>-0.789518000<br>1.806604000<br>0.206375000<br>3.330324000<br>0.750884000<br>-1.369998000 | -1.582496000<br>1.079035000<br>-1.387775000<br>-2.139908000<br>-1.454211000<br>-2.556355000<br>0.446030000<br>2.632968000<br>2.682877000<br>1.496968000<br>-1.498846000<br>1.587441000<br>2.382263000<br>-0.790697000  | 0.971550000<br>1.020226000<br>-0.472212000<br>-0.987358000<br>-0.678062000<br>1.307256000<br>-1.226899000<br>-2.087802000<br>0.020434000<br>-0.097513000<br>1.176612000<br>1.835783000<br>0.793442000<br>1.514923000 | -649.4975411  | -649.54253109 |
| 27 | TS4(c)<br>( $\nu = 1036i \text{ cm}^{-1}$ )<br>  | C<br>O<br>N<br>H<br>H<br>H<br>Pt<br>Pt<br>Pt<br>Pt<br>H<br>H<br>H<br>H<br>H | -1.811403000<br>2.450248000<br>-0.581716000<br>-0.727700000<br>0.161651000<br>-1.633246000<br>0.164219000<br>1.176771000<br>-0.744493000<br>1.874461000<br>-2.140511000<br>3.084045000<br>1.324546000<br>-2.596872000  | -2.045590000<br>1.999141000<br>-1.270210000<br>-0.583799000<br>-1.879396000<br>-2.785489000<br>-0.141650000<br>1.353670000<br>2.261865000<br>1.739319000<br>-2.555777000<br>2.726311000<br>2.554820000<br>-1.373213000 | 0.201777000<br>1.405053000<br>0.424889000<br>1.158262000<br>0.753356000<br>-0.577060000<br>-1.195756000<br>-2.992396000<br>-1.638826000<br>-0.570100000<br>1.111946000<br>1.403337000<br>0.653897000<br>-0.138384000 | -649.45812812 | -649.50357401 |
| 28 | min5(c)<br>                                    | C<br>O<br>N<br>H<br>H<br>H<br>Pt<br>Pt<br>Pt<br>Pt<br>H<br>H<br>H<br>H<br>H | -1.829550000<br>2.247143000<br>-0.561618000<br>-0.680050000<br>0.144732000<br>-1.689293000<br>0.216345000<br>1.126206000<br>-0.863158000<br>1.667676000<br>-2.189798000<br>3.191829000<br>1.794111000<br>-2.574574000  | -2.146686000<br>2.510853000<br>-1.452539000<br>-0.791833000<br>-2.116817000<br>-2.843717000<br>-0.274576000<br>1.257447000<br>2.077606000<br>1.839129000<br>-2.694450000<br>2.695597000<br>3.351958000<br>-1.411973000 | 0.079783000<br>1.405351000<br>0.348259000<br>1.109066000<br>0.648908000<br>-0.744956000<br>-1.220959000<br>-3.025193000<br>-1.649580000<br>-0.633737000<br>0.956491000<br>1.419657000<br>1.526626000<br>-0.219714000 | -649.48344907 | -649.52951927 |
| 29 | TS5(c)<br>( $\nu = 170i \text{ cm}^{-1}$ )<br> | C<br>O<br>N<br>H<br>H<br>H<br>Pt<br>Pt<br>Pt<br>Pt<br>H<br>H<br>H<br>H<br>H | -1.432849000<br>1.070842000<br>-0.044271000<br>0.450350000<br>-0.026846000<br>-1.905648000<br>1.016278000<br>1.998231000<br>-0.360507000<br>1.685014000<br>-2.025461000<br>0.284321000<br>0.746876000<br>-1.456331000  | -1.027618000<br>1.428591000<br>-1.286017000<br>-1.793324000<br>-1.893614000<br>-0.432906000<br>-0.366826000<br>1.461238000<br>1.905628000<br>1.896804000<br>-1.935605000<br>1.956281000<br>0.535493000<br>-0.448125000 | 0.901815000<br>1.164745000<br>0.522485000<br>1.247698000<br>-0.294812000<br>0.119429000<br>-1.903763000<br>-3.424566000<br>-2.528406000<br>-0.927211000<br>1.058085000<br>1.336577000<br>0.900864000<br>1.827062000  | -649.44645253 | -649.49210026 |
| 30 | product (c) –<br>{Pt <sub>3</sub> Pt <sub>(4)</sub> –(OH) <sub>2</sub> ...NH <sub>2</sub><br>CH <sub>3</sub> }                    | C<br>O<br>N<br>H<br>H<br>H                                                  | -1.308491000<br>1.835294000<br>-0.080804000<br>0.208366000<br>-0.225017000<br>-1.612052000                                                                                                                             | -1.297417000<br>0.332666000<br>-1.368424000<br>-2.328874000<br>-0.951140000<br>-0.253125000                                                                                                                            | 1.078275000<br>0.762977000<br>0.291177000<br>0.149183000<br>-0.630126000<br>1.165431000                                                                                                                              | -649.46273962 | -649.50892580 |

|    |                                                                                                                            |                                                                                                                                                                                                                                                                                                                                                     |               |               |
|----|----------------------------------------------------------------------------------------------------------------------------|-----------------------------------------------------------------------------------------------------------------------------------------------------------------------------------------------------------------------------------------------------------------------------------------------------------------------------------------------------|---------------|---------------|
|    | 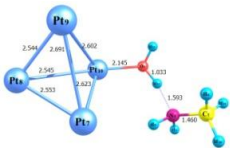                                          | Pt -0.774374000 1.213442000 -2.394378000<br>Pt 1.135168000 2.692555000 -3.222325000<br>Pt -0.146738000 3.539144000 -1.194273000<br>Pt 1.433834000 1.480442000 -1.004020000<br>H -1.125280000 -1.682806000 2.082659000<br>H 1.700706000 0.873557000 1.545714000<br>H 1.099483000 -0.391875000 0.729696000<br>H -2.140093000 -1.858144000 0.640013000 |               |               |
| 31 | {Pt <sub>3</sub> Pt—OH <sub>2</sub> }<br> | O -10.365185000 0.781005000 2.355422000<br>H -9.889195000 1.237084000 3.058152000<br>H -10.848344000 0.061659000 2.774728000<br>Pt -6.899294000 -0.987474000 -0.369535000<br>Pt -6.280598000 0.380818000 1.864057000<br>Pt -8.743848000 -0.093390000 1.108048000<br>Pt -7.211006000 -1.997840000 1.952839000                                        | -553.72339995 | -553.76496670 |

**Table S3.** Cartesian coordinates of compounds and their energy characteristics (298.15 K, 1.00 atm) for critical points (minima and transition states) of MEP curves of reaction (**3a**)

| N <sup>o</sup> |                                                                                                                                                                |    | x            | y            | z            | $E_{\text{el}} + ZPE$ (Eh) | $G^0$ (Eh)     |
|----------------|----------------------------------------------------------------------------------------------------------------------------------------------------------------|----|--------------|--------------|--------------|----------------------------|----------------|
| 1              | Pt <sub>3</sub> V<br>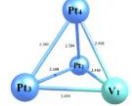                                                         | V  | -0.173582000 | -0.006451000 | 1.783481000  | -1301.81665941             | -1301.85443045 |
|                |                                                                                                                                                                | Pt | 0.035693000  | 1.526975000  | -0.141413000 |                            |                |
|                |                                                                                                                                                                | Pt | -1.333343000 | -0.798590000 | -0.250454000 |                            |                |
|                |                                                                                                                                                                | Pt | 1.240465000  | -0.751747000 | -0.163197000 |                            |                |
| 2              | Pt <sub>3</sub> V+ OC(H)NH <sub>2</sub><br>                                   | C  | -0.773516000 | -5.575095000 | 0.346531000  | -1471.59145088             | -1471.63536193 |
|                |                                                                                                                                                                | O  | 0.296902000  | -4.965754000 | 0.407920000  |                            |                |
|                |                                                                                                                                                                | N  | -1.001505000 | -6.700000000 | 1.012180000  |                            |                |
|                |                                                                                                                                                                | H  | -0.284301000 | -7.089309000 | 1.603039000  |                            |                |
|                |                                                                                                                                                                | H  | -1.886798000 | -7.168514000 | 0.940050000  |                            |                |
|                |                                                                                                                                                                | H  | -1.598781000 | -5.203740000 | -0.275164000 |                            |                |
|                |                                                                                                                                                                | Pt | -0.813848000 | -3.248171000 | -2.816827000 |                            |                |
|                |                                                                                                                                                                | Pt | 0.270922000  | -1.039322000 | -2.118650000 |                            |                |
|                |                                                                                                                                                                | Pt | -1.661199000 | -1.866943000 | -0.668236000 |                            |                |
|                |                                                                                                                                                                | V  | 0.477685000  | -3.176183000 | -0.669503000 |                            |                |
| 3              | reagent (a) — {H <sub>2</sub> + Pt <sub>3</sub> V—OC(H)NH <sub>2</sub> }<br> | C  | 0.166571000  | -0.007808000 | 1.588742000  | -1472.74892612             | -1472.79563209 |
|                |                                                                                                                                                                | O  | 0.773173000  | 1.018536000  | 1.907589000  |                            |                |
|                |                                                                                                                                                                | N  | -0.094795000 | -0.984922000 | 2.446967000  |                            |                |
|                |                                                                                                                                                                | H  | 0.204582000  | -0.908419000 | 3.406011000  |                            |                |
|                |                                                                                                                                                                | H  | -0.591926000 | -1.805838000 | 2.151177000  |                            |                |
|                |                                                                                                                                                                | H  | -0.183514000 | -0.152887000 | 0.556854000  |                            |                |
|                |                                                                                                                                                                | Pt | 0.662135000  | 1.536421000  | -1.807475000 |                            |                |
|                |                                                                                                                                                                | Pt | 1.486850000  | 4.059968000  | -1.520642000 |                            |                |
|                |                                                                                                                                                                | Pt | -0.863414000 | 3.403756000  | -0.849212000 |                            |                |
|                |                                                                                                                                                                | V  | 1.130338000  | 2.496933000  | 0.455958000  |                            |                |
|                |                                                                                                                                                                | H  | -0.988930000 | -4.328592000 | -4.278895000 |                            |                |
|                |                                                                                                                                                                | H  | -1.701069000 | -4.327148000 | -4.057075000 |                            |                |
| 4              | min1(a)<br>                                                                 | C  | -0.728137000 | -5.699862000 | 0.775210000  | -1472.81905059             | -1472.86258454 |
|                |                                                                                                                                                                | O  | -0.149201000 | -4.652525000 | 1.091522000  |                            |                |
|                |                                                                                                                                                                | N  | -0.954274000 | -6.677826000 | 1.638346000  |                            |                |
|                |                                                                                                                                                                | H  | -0.652760000 | -6.587832000 | 2.595780000  |                            |                |
|                |                                                                                                                                                                | H  | -1.424241000 | -7.516572000 | 1.347037000  |                            |                |
|                |                                                                                                                                                                | H  | -1.079791000 | -5.856067000 | -0.253800000 |                            |                |
|                |                                                                                                                                                                | Pt | -0.562230000 | -4.080453000 | -2.577375000 |                            |                |
|                |                                                                                                                                                                | Pt | 0.727697000  | -1.751811000 | -2.417999000 |                            |                |
|                |                                                                                                                                                                | Pt | -1.562538000 | -1.812313000 | -1.515062000 |                            |                |
|                |                                                                                                                                                                | V  | 0.215767000  | -3.183548000 | -0.351726000 |                            |                |
|                |                                                                                                                                                                | H  | 0.364432000  | -5.233979000 | -3.052826000 |                            |                |
|                |                                                                                                                                                                | H  | -1.509006000 | -5.315586000 | -2.420453000 |                            |                |
| 5              | TS1(a)<br>( $\nu = 439i \text{ cm}^{-1}$ )<br>                              | C  | -0.194829000 | -0.947620000 | 1.064674000  | -1472.79523155             | -1472.83895026 |
|                |                                                                                                                                                                | O  | 0.118810000  | 0.238180000  | 1.240708000  |                            |                |
|                |                                                                                                                                                                | N  | -0.339923000 | -1.795574000 | 2.067737000  |                            |                |
|                |                                                                                                                                                                | H  | -0.205579000 | -1.485961000 | 3.017687000  |                            |                |
|                |                                                                                                                                                                | H  | -0.593430000 | -2.752131000 | 1.893567000  |                            |                |
|                |                                                                                                                                                                | H  | -0.365030000 | -1.332044000 | 0.050165000  |                            |                |
|                |                                                                                                                                                                | Pt | -0.189818000 | 0.458718000  | -2.247474000 |                            |                |
|                |                                                                                                                                                                | Pt | 1.146507000  | 2.695656000  | -2.235356000 |                            |                |
|                |                                                                                                                                                                | Pt | -0.212516000 | 3.892029000  | -0.306312000 |                            |                |
|                |                                                                                                                                                                | V  | 0.360795000  | 1.721819000  | -0.148300000 |                            |                |
|                |                                                                                                                                                                | H  | 1.334571000  | 0.301541000  | -2.351522000 |                            |                |
|                |                                                                                                                                                                | H  | -0.859558000 | -0.994611000 | -2.045574000 |                            |                |
| 6              | min2(a)<br>                                                                 | C  | -0.375232000 | -1.113064000 | 1.151265000  | -1472.81822519             | -1472.86194347 |
|                |                                                                                                                                                                | O  | -0.270548000 | 0.118175000  | 1.126014000  |                            |                |
|                |                                                                                                                                                                | N  | -0.550986000 | -1.786176000 | 2.276625000  |                            |                |

|    |                                                                                                                                  |                                                                                                                                                                                                                    |                                                                                                                                                                                         |                                                                                                                                                                                        |                |                |
|----|----------------------------------------------------------------------------------------------------------------------------------|--------------------------------------------------------------------------------------------------------------------------------------------------------------------------------------------------------------------|-----------------------------------------------------------------------------------------------------------------------------------------------------------------------------------------|----------------------------------------------------------------------------------------------------------------------------------------------------------------------------------------|----------------|----------------|
|    | 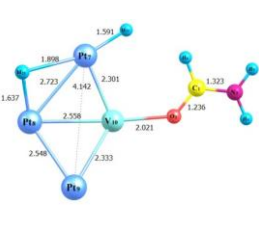                                                | H -0.597451000<br>H -0.633642000<br>H -0.326547000<br>Pt 0.205404000<br>Pt 0.560183000<br>Pt 1.047847000<br>V 0.092940000<br>H 1.066846000<br>H -0.218817000                                                       | -1.297345000<br>-2.787227000<br>-1.696013000<br>0.244437000<br>2.944530000<br>3.507740000<br>1.423560000<br>1.665520000<br>-1.224136000                                                 | 3.156831000<br>2.265209000<br>0.225312000<br>-2.345935000<br>-2.375666000<br>0.061446000<br>-0.372810000<br>-3.262407000<br>-1.905883000                                               |                |                |
| 7  | TS2(a)<br>( $\nu = 448i \text{ cm}^{-1}$ )<br>  | C -0.187729000<br>O 0.352392000<br>N -0.380579000<br>H -0.091289000<br>H -0.823505000<br>H -0.525915000<br>Pt 0.201655000<br>Pt 0.462431000<br>Pt -0.088656000<br>V 0.559372000<br>H 1.688364000<br>H -1.166540000 | -0.957338000<br>0.152875000<br>-1.752007000<br>-1.461976000<br>-2.646268000<br>-1.324275000<br>0.077830000<br>2.692944000<br>3.666792000<br>1.455091000<br>0.865514000<br>-0.769182000  | 1.110506000<br>1.215455000<br>2.147521000<br>3.068759000<br>2.029867000<br>0.131369000<br>-2.258636000<br>-2.508176000<br>-0.223990000<br>-0.345400000<br>-1.858262000<br>-2.509011000 | -1472.78444015 | -1472.82803979 |
| 8  | min3(a)<br>                                    | C -0.107790000<br>O 0.638582000<br>N -0.352254000<br>H 0.064547000<br>H -0.962455000<br>H -0.587618000<br>Pt 0.261715000<br>Pt -1.002328000<br>Pt 0.519811000<br>V 0.874448000<br>H 1.839622000<br>H -1.186281000  | -0.937818000<br>0.038701000<br>-1.811567000<br>-1.694915000<br>-2.592539000<br>-1.109435000<br>0.223980000<br>2.274197000<br>3.731289000<br>1.434909000<br>0.618278000<br>-0.175081000  | 0.999194000<br>1.168017000<br>1.957595000<br>2.868237000<br>1.792421000<br>0.025805000<br>-2.364898000<br>-1.517964000<br>-0.082447000<br>-0.274848000<br>-1.657692000<br>-2.913419000 | -1472.79875139 | -1472.84265187 |
| 9  | TS3(a)<br>( $\nu = 87i \text{ cm}^{-1}$ )<br> | C -0.386455000<br>O -1.202138000<br>N 0.689085000<br>H 1.198975000<br>H 1.300763000<br>H -0.896677000<br>Pt -0.418726000<br>Pt 0.415978000<br>Pt 0.939641000<br>V -0.604352000<br>H 0.045433000<br>H -1.081527000  | -1.025480000<br>-0.056022000<br>-1.331507000<br>-0.521008000<br>-2.054823000<br>-1.927211000<br>0.089245000<br>2.501208000<br>2.889027000<br>1.225995000<br>-0.609625000<br>0.820202000 | 0.798076000<br>1.237287000<br>1.628724000<br>1.953345000<br>1.281509000<br>0.445800000<br>-2.217685000<br>-1.907622000<br>0.540187000<br>0.012515000<br>-0.361815000<br>-3.410323000   | -1472.77612155 | -1472.81848934 |
| 10 | min4(a)<br>                                   | C 0.757826000<br>O 0.798920000<br>N -0.246684000<br>H -0.124620000<br>H -1.177580000<br>H 0.601267000<br>Pt -0.804844000<br>Pt -1.163198000<br>Pt 1.193238000<br>V 0.363576000<br>H 1.737048000<br>H -1.934950000  | -1.587356000<br>-0.654043000<br>-1.358404000<br>-0.471063000<br>-1.394256000<br>-2.576251000<br>1.867730000<br>2.866736000<br>3.134200000<br>0.880748000<br>-1.580289000<br>0.872247000 | 0.925916000<br>-0.130742000<br>1.908383000<br>2.378434000<br>1.514376000<br>0.484749000<br>-2.778120000<br>-0.419696000<br>-1.220022000<br>-0.890363000<br>1.414808000<br>-3.187722000 | -1472.80666895 | -1472.85053789 |
| 11 | TS4(a)<br>( $\nu = 966i \text{ cm}^{-1}$ )                                                                                       | C 0.638051000<br>O -0.350546000<br>N 0.107233000<br>H -0.393536000<br>H -0.485563000                                                                                                                               | -0.716828000<br>0.342765000<br>-2.000391000<br>-2.050593000<br>-2.329218000                                                                                                             | 0.758970000<br>0.757126000<br>1.009898000<br>1.886203000<br>0.260294000                                                                                                                | -1472.75790116 | -1472.80067033 |

|    |                                                                                           |                                                                                                                           |                                                                                                                                                                                                                                                        |                                                                                                                                                                                                                              |                                                                                                                                                                                                                          |                |                |
|----|-------------------------------------------------------------------------------------------|---------------------------------------------------------------------------------------------------------------------------|--------------------------------------------------------------------------------------------------------------------------------------------------------------------------------------------------------------------------------------------------------|------------------------------------------------------------------------------------------------------------------------------------------------------------------------------------------------------------------------------|--------------------------------------------------------------------------------------------------------------------------------------------------------------------------------------------------------------------------|----------------|----------------|
|    |                                                                                           | H 1.146649000<br>Pt -1.912542000<br>Pt 0.367493000<br>Pt 1.022431000<br>V -0.379961000<br>H 1.349935000<br>H -1.109645000 | -0.712475000<br>0.706249000<br>1.506018000<br>3.587798000<br>1.989057000<br>-0.447129000<br>0.124748000                                                                                                                                                | -0.208652000<br>-1.696342000<br>-2.559012000<br>-1.261975000<br>-0.294503000<br>1.541288000<br>-0.193296000                                                                                                                  |                                                                                                                                                                                                                          |                |                |
| 12 | product (a) —<br>{Pt <sub>3</sub> V—O(H)CH <sub>2</sub> NH <sub>2</sub> }                 |                                                                                                                           | C 0.757062000<br>O 0.857460000<br>N -0.386257000<br>H -0.241236000<br>H -1.218074000<br>H 0.737751000<br>Pt -1.205840000<br>Pt 0.175925000<br>Pt 2.264828000<br>V 0.615295000<br>H 1.661626000<br>H 0.451626000                                        | -5.581131000<br>-4.156484000<br>-6.103094000<br>-6.987680000<br>-6.112319000<br>-5.628466000<br>-3.340117000<br>-1.259243000<br>-1.186810000<br>-2.732323000<br>-6.058850000<br>-4.033733000                                 | 0.471293000<br>0.762346000<br>1.114960000<br>1.572754000<br>0.543677000<br>-0.620441000<br>-2.039337000<br>-2.671330000<br>-1.184809000<br>-0.731480000<br>0.850599000<br>1.630970000                                    | -1472.75617256 | -1472.80105145 |
| 13 | reagent (b) —<br>{H <sub>2</sub> +Pt <sub>3</sub> V—O(H)CH <sub>2</sub> NH <sub>2</sub> } |                                                                                                                           | C 0.118258000<br>O 0.914734000<br>N -1.119871000<br>H -1.517491000<br>H -1.782831000<br>H 0.054307000<br>Pt -1.746057000<br>Pt -0.539235000<br>Pt -1.784622000<br>V 0.345009000<br>H 0.664196000<br>H 0.774799000<br>H -5.335128000<br>H -5.770952000  | -5.862411000<br>-4.702310000<br>-5.794174000<br>-6.699158000<br>-5.200315000<br>-5.794839000<br>-3.370235000<br>-0.988063000<br>-1.734330000<br>-2.930659000<br>-6.762732000<br>-4.596991000<br>-6.415418000<br>-6.515820000 | -0.154210000<br>0.210910000<br>0.528430000<br>0.728844000<br>0.033790000<br>-1.245020000<br>-2.202652000<br>-2.258981000<br>-0.186688000<br>-0.889714000<br>0.137879000<br>1.162141000<br>-3.991317000<br>-3.394399000   | -1473.90317508 | -1473.95154112 |
| 14 | min1(b)                                                                                   |                                                                                                                           | C 0.041693000<br>O 0.808919000<br>N -1.188184000<br>H -1.499078000<br>H -1.911381000<br>H -0.043664000<br>Pt -1.679850000<br>Pt -0.289454000<br>Pt -1.510673000<br>V 0.413417000<br>H 0.630451000<br>H 0.627877000<br>H -1.398651000<br>H -2.469487000 | -5.844864000<br>-4.690657000<br>-5.885502000<br>-6.818079000<br>-5.357241000<br>-5.684025000<br>-3.143100000<br>-0.867904000<br>-1.380064000<br>-2.875649000<br>-6.740772000<br>-4.639149000<br>-4.017874000<br>-4.451447000 | -0.215328000<br>0.247672000<br>0.476283000<br>0.697680000<br>-0.000865000<br>-1.293985000<br>-2.194105000<br>-2.233673000<br>-0.156634000<br>-0.810745000<br>-0.008619000<br>1.196202000<br>-3.445851000<br>-1.859983000 | -1473.97272664 | -1474.01630519 |
| 15 | TS1(b)<br>( $\nu = 131i \text{ cm}^{-1}$ )                                                |                                                                                                                           | C 0.495848000<br>O 1.956600000<br>N -0.835458000<br>H -1.322729000<br>H -1.260373000<br>H 1.030456000<br>Pt -1.265864000<br>Pt 0.707172000<br>Pt -0.587947000<br>V 0.844224000                                                                         | -2.171136000<br>0.913590000<br>-2.098753000<br>-2.869527000<br>-1.190376000<br>-1.299708000<br>1.428887000<br>3.030314000<br>3.804746000<br>1.809856000                                                                      | 0.469946000<br>1.233854000<br>0.300783000<br>-0.122377000<br>0.161890000<br>0.817818000<br>-1.081710000<br>-1.977262000<br>0.027302000<br>0.147986000                                                                    | -1473.95335143 | -1473.99902046 |



|    |                                                                                                                                  |                                                                                                                                                                                                                                                      |                                                                                                                                                                                                                       |                                                                                                                                                                                                                       |                |                |
|----|----------------------------------------------------------------------------------------------------------------------------------|------------------------------------------------------------------------------------------------------------------------------------------------------------------------------------------------------------------------------------------------------|-----------------------------------------------------------------------------------------------------------------------------------------------------------------------------------------------------------------------|-----------------------------------------------------------------------------------------------------------------------------------------------------------------------------------------------------------------------|----------------|----------------|
|    | 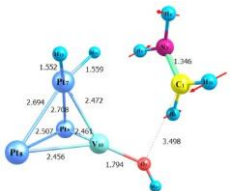                                                | H 0.984123000<br>H 2.795300000<br>H -1.234967000<br>H -2.306388000                                                                                                                                                                                   | -3.129854000<br>1.055258000<br>0.062277000<br>0.654424000                                                                                                                                                             | 0.383624000<br>1.672209000<br>-1.817452000<br>-0.216612000                                                                                                                                                            |                |                |
| 16 | min2(b)<br>                                     | C 0.386989000<br>O 2.080549000<br>N -0.442379000<br>H -1.373658000<br>H -0.476435000<br>H 1.309151000<br>Pt -1.181711000<br>Pt 0.532730000<br>Pt -1.246862000<br>V 0.451343000<br>H 0.197242000<br>H 2.717807000<br>H -0.721759000<br>H -2.233007000 | -1.967610000<br>0.668538000<br>-1.049471000<br>-0.982961000<br>-1.156172000<br>-2.246802000<br>1.042486000<br>2.986959000<br>2.623778000<br>0.828842000<br>-2.151014000<br>1.371378000<br>0.145772000<br>-0.113722000 | 0.286811000<br>1.093511000<br>0.939876000<br>0.537040000<br>1.947486000<br>0.771409000<br>-1.595425000<br>-1.053732000<br>0.606288000<br>0.334111000<br>-0.759473000<br>1.235123000<br>-2.771377000<br>-1.571648000   | -1473.98552959 | -1474.03057163 |
| 17 | TS2(b)<br>( $\nu = 72i \text{ cm}^{-1}$ )<br>  | C 0.112396000<br>O 1.897821000<br>N -0.243213000<br>H -1.189773000<br>H 0.431254000<br>H 1.077933000<br>Pt -0.957263000<br>Pt 0.541651000<br>Pt -1.606615000<br>V 0.367536000<br>H -0.669192000<br>H 2.564326000<br>H -0.325117000<br>H -2.001742000 | -1.394595000<br>0.490562000<br>-1.056255000<br>-1.269255000<br>-1.313755000<br>-1.886753000<br>1.180878000<br>3.009196000<br>2.347967000<br>0.674311000<br>-1.927517000<br>1.175748000<br>-0.152712000<br>0.122181000 | -0.100643000<br>1.288102000<br>1.256007000<br>1.531433000<br>1.964822000<br>-0.184232000<br>-2.027582000<br>-0.844213000<br>0.198744000<br>0.278765000<br>-0.632782000<br>1.194049000<br>-1.375756000<br>-2.546713000 | -1473.98731086 | -1474.02955274 |
| 18 | min3(b)<br>                                   | C 0.232421000<br>O 2.096332000<br>N -0.485898000<br>H -1.411856000<br>H -0.606350000<br>H 1.252960000<br>Pt -1.126611000<br>Pt 0.336472000<br>Pt -1.600020000<br>V 0.378150000<br>H -0.255201000<br>H 2.873618000<br>H 0.266941000<br>H -1.950960000 | -1.947893000<br>0.828005000<br>-0.830148000<br>-0.733129000<br>-0.993489000<br>-1.977591000<br>1.530495000<br>3.502428000<br>2.626803000<br>1.083099000<br>-2.907925000<br>1.379164000<br>-1.772893000<br>0.213076000 | 0.035817000<br>0.675117000<br>0.665363000<br>0.253504000<br>1.659856000<br>0.415770000<br>-1.686779000<br>-0.639993000<br>0.635770000<br>0.223338000<br>0.222202000<br>0.577806000<br>-1.039672000<br>-1.998099000    | -1474.02456517 | -1474.06878570 |
| 19 | TS3(b)<br>( $\nu = 59i \text{ cm}^{-1}$ )<br> | C -0.127010000<br>O 1.596493000<br>N -0.201919000<br>H -0.988579000<br>H 0.691344000<br>H 0.699066000<br>Pt -0.743718000<br>Pt -0.743278000<br>Pt -1.969099000<br>V 0.595870000<br>H 0.050964000<br>H 2.545234000                                    | -2.254441000<br>0.742911000<br>-0.796484000<br>-0.460300000<br>-0.299672000<br>-2.517336000<br>2.020714000<br>4.244456000<br>2.062489000<br>2.283437000<br>-2.691418000<br>0.614685000                                | -0.054709000<br>1.014353000<br>0.067973000<br>0.635764000<br>0.497802000<br>-0.713651000<br>-1.959924000<br>-0.616340000<br>0.244370000<br>0.271500000<br>0.926993000<br>0.977290000                                  | -1473.94555451 | -1473.98936557 |

|    |                                                                                                                                                                              |    |              |              |              |                |                |
|----|------------------------------------------------------------------------------------------------------------------------------------------------------------------------------|----|--------------|--------------|--------------|----------------|----------------|
|    |                                                                                                                                                                              | H  | -1.053945000 | -2.653206000 | -0.465417000 |                |                |
|    |                                                                                                                                                                              | H  | -0.351422000 | -0.295836000 | -0.826003000 |                |                |
| 20 | product ( <b>b</b> )—<br>$\{\text{Pt}_3\text{V}-(\text{OH}_2)\cdots\text{NH}_2\text{CH}\}$ 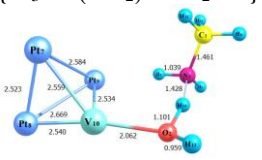 | C  | 0.506289000  | -7.535839000 | -2.776492000 | -1473.95114782 | -1473.99654133 |
|    |                                                                                                                                                                              | O  | 0.532536000  | -4.163642000 | -3.458143000 |                |                |
|    |                                                                                                                                                                              | N  | 1.246858000  | -6.329472000 | -2.415256000 |                |                |
|    |                                                                                                                                                                              | H  | 0.944565000  | -5.985686000 | -1.482594000 |                |                |
|    |                                                                                                                                                                              | H  | 2.243755000  | -6.506488000 | -2.367013000 |                |                |
|    |                                                                                                                                                                              | H  | 0.777788000  | -7.853463000 | -3.784687000 |                |                |
|    |                                                                                                                                                                              | Pt | -2.461784000 | -4.175685000 | -0.435476000 |                |                |
|    |                                                                                                                                                                              | Pt | -1.087564000 | -2.202262000 | 0.327271000  |                |                |
|    |                                                                                                                                                                              | Pt | -0.033079000 | -4.654410000 | 0.307088000  |                |                |
|    |                                                                                                                                                                              | V  | -0.475197000 | -3.379796000 | -1.838283000 |                |                |
|    |                                                                                                                                                                              | H  | 0.687559000  | -8.364802000 | -2.087571000 |                |                |
|    |                                                                                                                                                                              | H  | -0.560403000 | -7.309533000 | -2.761674000 |                |                |
|    |                                                                                                                                                                              | H  | 0.321492000  | -4.140149000 | -4.392860000 |                |                |
|    |                                                                                                                                                                              | H  | 0.903084000  | -5.152854000 | -3.147003000 |                |                |
| 21 | $\{\text{Pt}_3\text{V}-\text{OH}_2\}$                                                       | V  | -0.824543000 | -0.688159000 | 1.677959000  | -1378.20623079 | -1378.24667250 |
|    |                                                                                                                                                                              | Pt | -0.192057000 | 1.438470000  | 0.521778000  |                |                |
|    |                                                                                                                                                                              | Pt | -0.788746000 | -0.711086000 | -0.877643000 |                |                |
|    |                                                                                                                                                                              | Pt | 1.366108000  | -0.705818000 | 0.436125000  |                |                |
|    |                                                                                                                                                                              | O  | -0.605080000 | 0.233822000  | 3.622532000  |                |                |
|    |                                                                                                                                                                              | H  | -0.347084000 | 1.048921000  | 3.136622000  |                |                |
|    |                                                                                                                                                                              | H  | 0.143346000  | 0.003299000  | 4.182683000  |                |                |



**Table S4.** Cartesian coordinates of compounds and their energy characteristics (298.15 K, 1.00 atm) for critical points (minima and transition states) of MEP curves of reaction (**3b**)

| N <sup>o</sup> |                                                                                                                                                                           |    | x            | y            | z            | E <sub>el</sub> + ZPE (Eh) | G <sup>0</sup> (Eh) |
|----------------|---------------------------------------------------------------------------------------------------------------------------------------------------------------------------|----|--------------|--------------|--------------|----------------------------|---------------------|
| 1              | Pt3V-formamide<br>                                                                       | C  | -0.493843000 | -5.911359000 | 0.387911000  | -1471.57759947             | -1471.62056793      |
|                |                                                                                                                                                                           | O  | -0.505759000 | -4.682703000 | 0.437211000  |                            |                     |
|                |                                                                                                                                                                           | N  | -1.123485000 | -6.667749000 | 1.285984000  |                            |                     |
|                |                                                                                                                                                                           | H  | -1.612102000 | -6.232632000 | 2.051611000  |                            |                     |
|                |                                                                                                                                                                           | H  | -1.087558000 | -7.669179000 | 1.229847000  |                            |                     |
|                |                                                                                                                                                                           | H  | 0.036218000  | -6.447384000 | -0.407454000 |                            |                     |
|                |                                                                                                                                                                           | V  | 0.078561000  | -3.345372000 | -3.373396000 |                            |                     |
|                |                                                                                                                                                                           | Pt | 2.191517000  | -2.350991000 | -2.566396000 |                            |                     |
|                |                                                                                                                                                                           | Pt | 1.862430000  | -4.964830000 | -2.886310000 |                            |                     |
|                |                                                                                                                                                                           | Pt | 0.689354000  | -3.570605000 | -0.935709000 |                            |                     |
| 2              | reagent (a) –<br>{H <sub>2</sub> +Pt <sub>2</sub> VPt–OC(H)N<br>H <sub>2</sub> }_Td<br> | C  | -0.345503000 | -6.065183000 | 0.769357000  | -1472.73617795             | -1472.78316850      |
|                |                                                                                                                                                                           | O  | -0.044899000 | -4.890281000 | 0.972646000  |                            |                     |
|                |                                                                                                                                                                           | N  | -0.925480000 | -6.824238000 | 1.697926000  |                            |                     |
|                |                                                                                                                                                                           | H  | -1.115648000 | -6.442094000 | 2.610073000  |                            |                     |
|                |                                                                                                                                                                           | H  | -1.151866000 | -7.783512000 | 1.508566000  |                            |                     |
|                |                                                                                                                                                                           | H  | -0.152770000 | -6.547118000 | -0.195978000 |                            |                     |
|                |                                                                                                                                                                           | V  | -0.080694000 | -3.069701000 | -2.701150000 |                            |                     |
|                |                                                                                                                                                                           | Pt | 2.313300000  | -2.640197000 | -2.362728000 |                            |                     |
|                |                                                                                                                                                                           | Pt | 1.325950000  | -5.079812000 | -2.837975000 |                            |                     |
|                |                                                                                                                                                                           | Pt | 1.010813000  | -3.809002000 | -0.533947000 |                            |                     |
|                |                                                                                                                                                                           | H  | -8.604222000 | -4.468163000 | -4.285954000 |                            |                     |
|                |                                                                                                                                                                           | H  | -8.121743000 | -5.017989000 | -4.431844000 |                            |                     |
| 3              | min1_Td (a)<br>                                                                        | C  | -0.260854000 | -6.100014000 | 0.837205000  | -1472.74606355             | -1472.79017781      |
|                |                                                                                                                                                                           | O  | -0.125860000 | -4.884766000 | 0.967118000  |                            |                     |
|                |                                                                                                                                                                           | N  | -0.766258000 | -6.869269000 | 1.800217000  |                            |                     |
|                |                                                                                                                                                                           | H  | -1.034714000 | -6.459179000 | 2.679981000  |                            |                     |
|                |                                                                                                                                                                           | H  | -0.847586000 | -7.861638000 | 1.673967000  |                            |                     |
|                |                                                                                                                                                                           | H  | 0.026808000  | -6.612750000 | -0.087791000 |                            |                     |
|                |                                                                                                                                                                           | V  | -0.330366000 | -3.303775000 | -2.817753000 |                            |                     |
|                |                                                                                                                                                                           | Pt | 1.977092000  | -2.541499000 | -2.461839000 |                            |                     |
|                |                                                                                                                                                                           | Pt | 1.348424000  | -5.109495000 | -2.797691000 |                            |                     |
|                |                                                                                                                                                                           | Pt | 0.805507000  | -3.763577000 | -0.588266000 |                            |                     |
|                |                                                                                                                                                                           | H  | -2.128818000 | -4.146285000 | -2.968812000 |                            |                     |
|                |                                                                                                                                                                           | H  | -1.611481000 | -4.736076000 | -3.044654000 |                            |                     |
| 4              | TS1(a)<br>(v=64i cm <sup>-1</sup> )<br>                                                | C  | -0.040248000 | -0.948842000 | 1.460753000  | -1472.741542400            | -1472.78517479      |
|                |                                                                                                                                                                           | O  | 0.068140000  | 0.273398000  | 1.513772000  |                            |                     |
|                |                                                                                                                                                                           | N  | -0.557662000 | -1.663994000 | 2.460723000  |                            |                     |
|                |                                                                                                                                                                           | H  | -0.855360000 | -1.199910000 | 3.303396000  |                            |                     |
|                |                                                                                                                                                                           | H  | -0.624631000 | -2.663276000 | 2.398230000  |                            |                     |
|                |                                                                                                                                                                           | H  | 0.279752000  | -1.521804000 | 0.583578000  |                            |                     |
|                |                                                                                                                                                                           | V  | -0.093872000 | 1.845694000  | -2.133130000 |                            |                     |
|                |                                                                                                                                                                           | Pt | 2.272493000  | 2.654714000  | -1.818234000 |                            |                     |
|                |                                                                                                                                                                           | Pt | 1.760479000  | 0.399684000  | -2.832280000 |                            |                     |
|                |                                                                                                                                                                           | Pt | 1.055605000  | 1.344196000  | -0.017252000 |                            |                     |
|                |                                                                                                                                                                           | H  | -1.885829000 | 1.014807000  | -2.339908000 |                            |                     |
|                |                                                                                                                                                                           | H  | -1.378867000 | 0.465333000  | -2.579647000 |                            |                     |
| 5              | min2(a) flat                                                                                                                                                              | C  | -1.595094000 | -1.313015000 | 0.214418000  | -1472.74976075             | -1472.79469387      |
|                |                                                                                                                                                                           | O  | -1.275059000 | -0.128964000 | 0.295962000  |                            |                     |

|   |                                                                                                                                |    |              |              |              |                |                |
|---|--------------------------------------------------------------------------------------------------------------------------------|----|--------------|--------------|--------------|----------------|----------------|
|   | 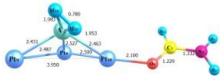                                              | N  | -2.498948000 | -1.864264000 | 1.023221000  |                |                |
|   |                                                                                                                                | H  | -2.955095000 | -1.299246000 | 1.721121000  |                |                |
|   |                                                                                                                                | H  | -2.746261000 | -2.832927000 | 0.935129000  |                |                |
|   |                                                                                                                                | H  | -1.153097000 | -1.984438000 | -0.529188000 |                |                |
|   |                                                                                                                                | V  | 2.394484000  | 1.231520000  | -0.587960000 |                |                |
|   |                                                                                                                                | Pt | 1.477789000  | 1.698286000  | -2.895856000 |                |                |
|   |                                                                                                                                | Pt | 3.005049000  | 3.284541000  | -1.738776000 |                |                |
|   |                                                                                                                                | Pt | 0.025587000  | 0.775239000  | -1.082498000 |                |                |
|   |                                                                                                                                | H  | 2.272216000  | 1.229086000  | 1.360858000  |                |                |
|   |                                                                                                                                | H  | 3.048430000  | 1.204181000  | 1.283569000  |                |                |
| 6 | TS2(a)<br>( $\nu=285i\text{ cm}^{-1}$ )<br>   | C  | -1.267053000 | -0.974751000 | 0.517742000  | -1472.74008599 | -1472.78363816 |
|   |                                                                                                                                | O  | -1.418474000 | -0.322906000 | -0.516036000 |                |                |
|   |                                                                                                                                | N  | -2.270489000 | -1.612688000 | 1.110176000  |                |                |
|   |                                                                                                                                | H  | -3.194454000 | -1.576448000 | 0.710668000  |                |                |
|   |                                                                                                                                | H  | -2.117600000 | -2.139912000 | 1.950837000  |                |                |
|   |                                                                                                                                | H  | -0.290054000 | -1.059884000 | 1.008837000  |                |                |
|   |                                                                                                                                | V  | 2.229971000  | 1.524419000  | -0.008416000 |                |                |
|   |                                                                                                                                | Pt | 2.074623000  | 1.879805000  | -2.573685000 |                |                |
|   |                                                                                                                                | Pt | 2.468084000  | 3.780852000  | -1.052810000 |                |                |
|   |                                                                                                                                | Pt | 0.225765000  | 0.679882000  | -1.424196000 |                |                |
|   |                                                                                                                                | H  | 2.286754000  | -0.061878000 | 0.805105000  |                |                |
|   |                                                                                                                                | H  | 1.272927000  | -0.116490000 | -0.528222000 |                |                |
| 7 | min 3(a)<br>                                 | C  | -1.553002000 | -1.227406000 | 0.233860000  | -1472.76430959 | -1472.80772712 |
|   |                                                                                                                                | O  | -1.161093000 | -0.069415000 | 0.104661000  |                |                |
|   |                                                                                                                                | N  | -2.506731000 | -1.564107000 | 1.096021000  |                |                |
|   |                                                                                                                                | H  | -2.933056000 | -0.855740000 | 1.671627000  |                |                |
|   |                                                                                                                                | H  | -2.809132000 | -2.517437000 | 1.182965000  |                |                |
|   |                                                                                                                                | H  | -1.133646000 | -2.047788000 | -0.358451000 |                |                |
|   |                                                                                                                                | V  | 2.603257000  | 1.239879000  | -0.389460000 |                |                |
|   |                                                                                                                                | Pt | 2.099785000  | 1.514566000  | -2.762669000 |                |                |
|   |                                                                                                                                | Pt | 1.107368000  | 3.034089000  | -0.787249000 |                |                |
|   |                                                                                                                                | Pt | 0.357721000  | 0.488782000  | -1.288058000 |                |                |
|   |                                                                                                                                | H  | 3.843005000  | 0.815569000  | 0.713178000  |                |                |
|   |                                                                                                                                | H  | 0.454144000  | -0.977446000 | -1.841277000 |                |                |
| 8 | TS3(a)<br>( $\nu=135i\text{ cm}^{-1}$ )<br> | 6  | -0.926522000 | -1.202512000 | 0.467684000  | -1472.71735833 | -1472.75980009 |
|   |                                                                                                                                | 8  | -0.577773000 | 0.025149000  | 1.026719000  |                |                |
|   |                                                                                                                                | 7  | -2.330678000 | -1.472053000 | 0.375379000  |                |                |
|   |                                                                                                                                | 1  | -2.808563000 | -0.688894000 | -0.054956000 |                |                |
|   |                                                                                                                                | 1  | -2.716851000 | -1.581986000 | 1.305560000  |                |                |
|   |                                                                                                                                | 1  | -0.450008000 | -2.024881000 | 1.018441000  |                |                |
|   |                                                                                                                                | 23 | 2.793935000  | 1.409016000  | -0.392254000 |                |                |
|   |                                                                                                                                | 78 | 1.726307000  | 1.842923000  | -2.504705000 |                |                |
|   |                                                                                                                                | 78 | 1.101067000  | 3.239675000  | -0.420329000 |                |                |
|   |                                                                                                                                | 78 | 0.398957000  | 0.795979000  | -0.496239000 |                |                |
|   |                                                                                                                                | 1  | 4.294985000  | 0.942273000  | 0.253559000  |                |                |
|   |                                                                                                                                | 1  | -0.504856000 | -1.284690000 | -0.578858000 |                |                |
| 9 | min 4(a)<br>                                | C  | -1.326512000 | -1.230694000 | 0.418785000  | -1472.73267577 | -1472.77582014 |
|   |                                                                                                                                | O  | -1.435776000 | 0.119168000  | 0.010194000  |                |                |
|   |                                                                                                                                | N  | -2.580647000 | -1.777728000 | 0.817210000  |                |                |
|   |                                                                                                                                | H  | -3.245592000 | -1.742279000 | 0.054817000  |                |                |
|   |                                                                                                                                | H  | -2.969802000 | -1.254910000 | 1.591605000  |                |                |
|   |                                                                                                                                | H  | -0.628925000 | -1.302858000 | 1.260768000  |                |                |
|   |                                                                                                                                | V  | 2.311166000  | 0.741230000  | -0.816073000 |                |                |
|   |                                                                                                                                | Pt | 1.381911000  | 2.183970000  | -2.585847000 |                |                |
|   |                                                                                                                                | Pt | 1.786111000  | 3.076190000  | -0.246030000 |                |                |
|   |                                                                                                                                | Pt | -0.056500000 | 1.267621000  | -0.617847000 |                |                |
|   |                                                                                                                                | H  | 3.431209000  | -0.508687000 | -0.538953000 |                |                |
|   |                                                                                                                                | H  | -0.929971000 | -1.829957000 | -0.408540000 |                |                |

|    |                                                                                                                                                                                                                                                                                                                                                                                                                                                                                                                                                                                                                        |                 |                |
|----|------------------------------------------------------------------------------------------------------------------------------------------------------------------------------------------------------------------------------------------------------------------------------------------------------------------------------------------------------------------------------------------------------------------------------------------------------------------------------------------------------------------------------------------------------------------------------------------------------------------------|-----------------|----------------|
| 10 | <div>TS4(a)<br/>(<math>\nu = 591 i \text{ cm}^{-1}</math>)</div> <div>C -0.780587000 -0.987812000 0.757116000<br/>O -0.883234000 0.332848000 0.273529000<br/>N -2.034890000 -1.672697000 0.749644000<br/>H -2.400351000 -1.726997000 -0.193183000<br/>H -2.713390000 -1.171961000 1.310037000<br/>H -0.410716000 -0.953211000 1.789336000<br/>V 2.935732000 0.931890000 -1.145105000<br/>Pt 1.655808000 2.573959000 -2.479849000<br/>Pt 2.346101000 3.111242000 -0.098339000<br/>Pt 0.501810000 1.390251000 -0.510842000<br/>H 1.847298000 -0.268983000 -0.609550000<br/>H -0.063582000 -1.558528000 0.157206000</div> | -1472.71865104  | -1472.76169316 |
| 11 | <div>min 5(a)</div> <div>C -0.907383000 -0.832637000 0.730988000<br/>O -0.665230000 0.263574000 -0.096866000<br/>N -2.261521000 -1.270438000 0.493346000<br/>H -2.331634000 -1.804803000 -0.362295000<br/>H -2.603910000 -1.834716000 1.258732000<br/>H -0.836239000 -0.563585000 1.795515000<br/>V 2.587906000 0.764828000 -2.144643000<br/>Pt 1.330077000 2.907654000 -2.313120000<br/>Pt 3.116126000 2.669148000 -0.611809000<br/>Pt 1.080317000 1.122764000 -0.190651000<br/>H 1.646666000 0.197339000 0.901142000<br/>H -0.155175000 -1.619127000 0.539660000</div>                                               | -1472.737236529 | -1472.78036555 |
| 12 | <div>TS5(a)<br/>(<math>\nu = 1070 i \text{ cm}^{-1}</math>)</div> <div>C -1.024527000 -0.831687000 0.267473000<br/>O -0.740989000 0.441934000 0.826637000<br/>N -2.012966000 -1.477090000 1.059993000<br/>H -2.853383000 -1.737157000 0.575304000<br/>H -1.683079000 -2.207064000 1.667126000<br/>H -0.097907000 -1.421211000 0.210863000<br/>V 2.786751000 0.601467000 -1.154257000<br/>Pt 3.051002000 2.086176000 -3.052506000<br/>Pt 2.589940000 3.088331000 -0.820647000<br/>Pt 0.742469000 1.544194000 -0.044375000<br/>H 0.640538000 0.612376000 1.218564000<br/>H -1.397850000 -0.700268000 -0.754174000</div>  | -1472.70755776  | -1472.75140326 |
| 13 | <div>min 6(a)</div> <div>C -0.921026000 -1.065434000 0.695417000<br/>O -0.889743000 0.097240000 -0.160846000<br/>N -2.272782000 -1.415528000 0.945129000<br/>H -2.652091000 -2.113338000 0.324875000<br/>H -2.470874000 -1.639822000 1.906129000<br/>H -0.413749000 -0.833664000 1.633879000<br/>V 2.118229000 1.413505000 -2.484289000<br/>Pt 3.059774000 3.658524000 -2.578424000<br/>Pt 3.099504000 2.436535000 -0.405493000<br/>Pt 0.916666000 1.208837000 -0.353668000<br/>H -1.635483000 0.653673000 0.098889000<br/>H -0.338385000 -1.809428000 0.149277000</div>                                               | -1472.73776152  | -1472.78164    |

|    |                                                                             |                                                                                                                                                                               |                                                                                                                                                                                                                                                         |                                                                                                                                                                                                                         |                                                                                                                                                                                                                      |                |                |
|----|-----------------------------------------------------------------------------|-------------------------------------------------------------------------------------------------------------------------------------------------------------------------------|---------------------------------------------------------------------------------------------------------------------------------------------------------------------------------------------------------------------------------------------------------|-------------------------------------------------------------------------------------------------------------------------------------------------------------------------------------------------------------------------|----------------------------------------------------------------------------------------------------------------------------------------------------------------------------------------------------------------------|----------------|----------------|
|    |                                                                             | N -0.515370000<br>H -1.468537000<br>H -0.010884000<br>H 0.506285000<br>V 2.147920000<br>Pt 2.960167000<br>Pt 0.396817000<br>Pt 0.197349000<br>H 0.350276000<br>H -1.236199000 | -1.475473000<br>-1.743977000<br>-1.313301000<br>0.163472000<br>1.354930000<br>2.187644000<br>1.533992000<br>0.158635000<br>-1.818873000<br>0.211754000                                                                                                  | 2.784909000<br>2.974346000<br>3.640883000<br>2.054216000<br>-1.732575000<br>-3.674806000<br>-3.357474000<br>-1.226645000<br>0.626107000<br>1.702679000                                                                  |                                                                                                                                                                                                                      |                |                |
| 16 | reagent (b) –<br>{Pt <sub>2</sub> VPt–O(H)CH <sub>2</sub> NH <sub>2</sub> } |                                                                                                                                                                               | C -1.608108000<br>O -1.637838000<br>N -1.723852000<br>H -1.103479000<br>H -2.665828000<br>H -2.425975000<br>V 0.807048000<br>Pt 1.612433000<br>Pt -0.963016000<br>Pt -1.219646000<br>H -1.156183000<br>H -0.664017000<br>H 6.518546000<br>H 7.040856000 | 0.638609000<br>-0.057445000<br>-0.306549000<br>-0.139805000<br>-0.468466000<br>1.357544000<br>1.923542000<br>2.694367000<br>2.108634000<br>0.952130000<br>-0.885307000<br>1.180397000<br>-2.587204000<br>-3.116004000   | 1.995823000<br>0.732824000<br>3.046832000<br>3.821872000<br>3.367290000<br>1.919443000<br>-1.770814000<br>-3.740241000<br>-3.377023000<br>-1.123952000<br>0.852447000<br>2.082408000<br>-0.704898000<br>-0.642360000 | -1473.89748179 | -1473.94575633 |
| 17 | min1(b)                                                                     |                                                                                                                                                                               | C -0.510095000<br>O -0.014529000<br>N -1.124371000<br>H -0.890757000<br>H -2.119836000<br>H -1.175210000<br>V 1.109006000<br>Pt 1.808132000<br>Pt 3.076095000<br>Pt 1.329577000<br>H 0.332367000<br>H 0.322946000<br>H -0.647318000<br>H -0.625988000   | -0.249574000<br>-0.919948000<br>-1.205036000<br>-1.101707000<br>-1.302524000<br>0.519403000<br>-0.059670000<br>2.084678000<br>1.173479000<br>0.095117000<br>-1.774550000<br>2.229895000<br>-0.072191000<br>-0.812691000 | 2.223780000<br>1.044628000<br>3.073513000<br>4.047142000<br>2.949484000<br>1.826790000<br>-2.696111000<br>-3.618988000<br>-1.685009000<br>-0.256734000<br>1.330348000<br>2.742246000<br>-3.538516000<br>-3.290782000 | -1473.90619708 | -1473.95157129 |
| 18 | TS1_b<br>( $\nu=297\text{ i cm}^{-1}$ )                                     |                                                                                                                                                                               | C -0.508159000<br>O -0.202422000<br>N -1.230146000<br>H -0.930319000<br>H -2.232805000<br>H -1.050823000<br>V 0.758621000<br>Pt 1.806542000<br>Pt 3.044997000<br>Pt 1.239748000<br>H 0.024173000<br>H 0.422788000<br>H -0.487346000<br>H -0.654850000   | 0.007198000<br>-0.632605000<br>-0.901067000<br>-0.916661000<br>-0.818821000<br>0.908176000<br>0.737162000<br>2.892983000<br>1.211481000<br>0.277928000<br>-1.550131000<br>0.294784000<br>-0.753230000<br>-0.757196000   | 1.860765000<br>0.602392000<br>2.678071000<br>3.638935000<br>2.615617000<br>1.569523000<br>-3.070654000<br>-3.457318000<br>-2.118214000<br>-0.673989000<br>0.800156000<br>2.353568000<br>-3.779080000<br>-3.019774000 | -1473.89964613 | -1473.94429004 |
| 19 | min2(b)                                                                     |                                                                                                                                                                               | C -0.491256000<br>O -0.333996000<br>N -1.237981000<br>H -0.877172000<br>H -2.230583000<br>H -0.965328000<br>V 0.413859000<br>Pt 1.652719000<br>Pt 2.826159000<br>Pt 1.080392000                                                                         | 0.014937000<br>-0.620045000<br>-0.842355000<br>-0.907382000<br>-0.667118000<br>0.969119000<br>0.940600000<br>3.036051000<br>1.061210000<br>0.199606000                                                                  | 1.853993000<br>0.566796000<br>2.703611000<br>3.641153000<br>2.711744000<br>1.617470000<br>-3.096694000<br>-3.308735000<br>-2.363047000<br>-0.802665000                                                               | -1473.90221089 | -1473.94712509 |

|    |                                                                                                                               |    |              |              |              |                |                |
|----|-------------------------------------------------------------------------------------------------------------------------------|----|--------------|--------------|--------------|----------------|----------------|
|    |                                                                                                                               | H  | -0.188084000 | -1.560088000 | 0.731622000  |                |                |
|    |                                                                                                                               | H  | 0.494083000  | 0.203412000  | 2.285072000  |                |                |
|    |                                                                                                                               | H  | -0.179918000 | -0.872755000 | -3.650131000 |                |                |
|    |                                                                                                                               | H  | 0.037105000  | -0.955192000 | -2.890191000 |                |                |
| 20 | TS2<br>$(\nu = 447 \text{ i cm}^{-1})$<br>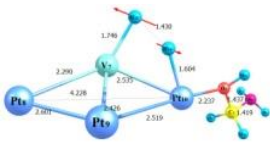   | C  | -0.506697000 | -0.082975000 | 1.924040000  | -1473.89595865 | -1473.94078491 |
|    |                                                                                                                               | O  | -0.267882000 | -0.688439000 | 0.643404000  |                |                |
|    |                                                                                                                               | N  | -1.359913000 | -0.922272000 | 2.687126000  |                |                |
|    |                                                                                                                               | H  | -1.104382000 | -0.994037000 | 3.658460000  |                |                |
|    |                                                                                                                               | H  | -2.343039000 | -0.720977000 | 2.588430000  |                |                |
|    |                                                                                                                               | H  | -0.915790000 | 0.900728000  | 1.679957000  |                |                |
|    |                                                                                                                               | V  | 0.395907000  | 1.126848000  | -3.145438000 |                |                |
|    |                                                                                                                               | Pt | 1.575173000  | 2.786010000  | -4.194596000 |                |                |
|    |                                                                                                                               | Pt | 2.744508000  | 1.159873000  | -2.536020000 |                |                |
|    |                                                                                                                               | Pt | 1.099454000  | 0.174102000  | -0.903511000 |                |                |
|    |                                                                                                                               | H  | -0.207473000 | -1.641512000 | 0.782398000  |                |                |
|    |                                                                                                                               | H  | 0.442481000  | 0.046614000  | 2.451608000  |                |                |
|    |                                                                                                                               | H  | -0.088029000 | -0.518966000 | -3.463667000 |                |                |
|    |                                                                                                                               | H  | 0.535682000  | -0.624996000 | -2.172190000 |                |                |
| 21 | min3(b)<br>                                  | C  | -1.021829000 | -0.475696000 | 1.174397000  | -1473.92667636 | -1473.97121521 |
|    |                                                                                                                               | O  | 0.340611000  | -0.940925000 | 0.900997000  |                |                |
|    |                                                                                                                               | N  | -1.145218000 | -0.230064000 | 2.556175000  |                |                |
|    |                                                                                                                               | H  | -1.498327000 | 0.681282000  | 2.794263000  |                |                |
|    |                                                                                                                               | H  | -1.583995000 | -0.957556000 | 3.096110000  |                |                |
|    |                                                                                                                               | H  | -1.649808000 | -1.281087000 | 0.792486000  |                |                |
|    |                                                                                                                               | V  | 0.770497000  | 1.394389000  | -1.808844000 |                |                |
|    |                                                                                                                               | Pt | 2.033822000  | 2.235210000  | -3.626646000 |                |                |
|    |                                                                                                                               | Pt | 1.462362000  | -0.230573000 | -3.592145000 |                |                |
|    |                                                                                                                               | Pt | 1.086613000  | -0.913655000 | -1.055244000 |                |                |
|    |                                                                                                                               | H  | 0.906960000  | -0.505617000 | 1.551284000  |                |                |
|    |                                                                                                                               | H  | -1.185659000 | 0.434328000  | 0.594539000  |                |                |
|    |                                                                                                                               | H  | -0.478130000 | 2.177950000  | -0.935441000 |                |                |
|    |                                                                                                                               | H  | 1.962102000  | -1.387988000 | -2.441932000 |                |                |
| 22 | TS3<br>$(\nu = 574 \text{ i cm}^{-1})$<br> | C  | -0.914438000 | -0.633538000 | 1.318683000  | -1473.90819343 | -1473.95307784 |
|    |                                                                                                                               | O  | 0.473197000  | -0.590681000 | 0.902612000  |                |                |
|    |                                                                                                                               | N  | -0.984894000 | -0.409734000 | 2.712920000  |                |                |
|    |                                                                                                                               | H  | -1.674376000 | 0.265654000  | 2.997038000  |                |                |
|    |                                                                                                                               | H  | -1.023834000 | -1.239816000 | 3.282211000  |                |                |
|    |                                                                                                                               | H  | -1.253232000 | -1.616166000 | 0.986235000  |                |                |
|    |                                                                                                                               | V  | 0.557586000  | 1.606865000  | -2.416570000 |                |                |
|    |                                                                                                                               | Pt | 2.864317000  | 1.729216000  | -2.132265000 |                |                |
|    |                                                                                                                               | Pt | 1.840879000  | -0.213164000 | -3.549861000 |                |                |
|    |                                                                                                                               | Pt | 0.988779000  | -0.527495000 | -1.202531000 |                |                |
|    |                                                                                                                               | H  | 0.903581000  | 0.077659000  | 1.451432000  |                |                |
|    |                                                                                                                               | H  | -1.465170000 | 0.139557000  | 0.780212000  |                |                |
|    |                                                                                                                               | H  | -0.672218000 | 2.756299000  | -2.726931000 |                |                |
|    |                                                                                                                               | H  | 0.359823000  | -1.344655000 | -2.403187000 |                |                |
| 23 | min4(b)<br>                                | C  | -0.700821000 | -1.052012000 | 1.790218000  | -1473.92186545 | -1473.96580420 |
|    |                                                                                                                               | O  | 0.537935000  | -0.387671000 | 1.443140000  |                |                |
|    |                                                                                                                               | N  | -1.194575000 | -0.505269000 | 2.997360000  |                |                |
|    |                                                                                                                               | H  | -2.174782000 | -0.279013000 | 2.986337000  |                |                |
|    |                                                                                                                               | H  | -0.940546000 | -1.006814000 | 3.833185000  |                |                |
|    |                                                                                                                               | H  | -0.423507000 | -2.106602000 | 1.832960000  |                |                |
|    |                                                                                                                               | V  | 0.527559000  | 0.736584000  | -2.440146000 |                |                |
|    |                                                                                                                               | Pt | 2.363742000  | 1.749560000  | -1.329698000 |                |                |
|    |                                                                                                                               | Pt | 2.581946000  | -0.549426000 | -2.711950000 |                |                |
|    |                                                                                                                               | Pt | 1.405582000  | -0.632858000 | -0.507187000 |                |                |
|    |                                                                                                                               | H  | 0.435326000  | 0.544176000  | 1.674387000  |                |                |
|    |                                                                                                                               | H  | -1.418099000 | -0.901446000 | 0.981741000  |                |                |
|    |                                                                                                                               | H  | -0.955439000 | 1.191619000  | -3.166275000 |                |                |
|    |                                                                                                                               | H  | 0.858274000  | -2.099935000 | -0.588853000 |                |                |

|    |                                                                                                                                  |    |              |              |              |                |                |
|----|----------------------------------------------------------------------------------------------------------------------------------|----|--------------|--------------|--------------|----------------|----------------|
| 24 | TS4<br>$(\nu = 483 \text{ i cm}^{-1})$<br>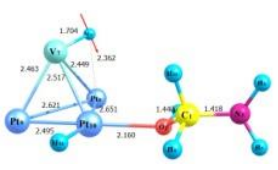      | C  | -0.771400000 | -0.710135000 | 1.332203000  | -1473.91103329 | -1473.95480159 |
|    |                                                                                                                                  | O  | 0.326966000  | 0.096257000  | 0.866924000  |                |                |
|    |                                                                                                                                  | N  | -1.299138000 | -0.135964000 | 2.516249000  |                |                |
|    |                                                                                                                                  | H  | -2.304528000 | -0.127867000 | 2.560751000  |                |                |
|    |                                                                                                                                  | H  | -0.900478000 | -0.489761000 | 3.371737000  |                |                |
|    |                                                                                                                                  | H  | -0.332131000 | -1.703370000 | 1.443766000  |                |                |
|    |                                                                                                                                  | V  | 0.241210000  | 0.633697000  | -3.162538000 |                |                |
|    |                                                                                                                                  | Pt | 1.878053000  | 2.105926000  | -2.089229000 |                |                |
|    |                                                                                                                                  | Pt | 2.566603000  | -0.177630000 | -3.174732000 |                |                |
|    |                                                                                                                                  | Pt | 1.271113000  | -0.253256000 | -1.043621000 |                |                |
|    |                                                                                                                                  | H  | 0.076980000  | 1.022633000  | 0.971875000  |                |                |
|    |                                                                                                                                  | H  | -1.542585000 | -0.746666000 | 0.559595000  |                |                |
|    |                                                                                                                                  | H  | -0.185206000 | 2.282128000  | -3.225640000 |                |                |
|    |                                                                                                                                  | H  | 0.974540000  | -1.795995000 | -0.927340000 |                |                |
| 25 | min5(b)<br>                                     | C  | -0.726278000 | -1.032421000 | 1.792949000  | -1473.95349046 | -1473.99715562 |
|    |                                                                                                                                  | O  | 0.494800000  | -0.373286000 | 1.413388000  |                |                |
|    |                                                                                                                                  | N  | -1.177388000 | -0.501420000 | 3.028518000  |                |                |
|    |                                                                                                                                  | H  | -2.170608000 | -0.344981000 | 3.072966000  |                |                |
|    |                                                                                                                                  | H  | -0.851690000 | -0.995604000 | 3.844440000  |                |                |
|    |                                                                                                                                  | H  | -0.455402000 | -2.090212000 | 1.805129000  |                |                |
|    |                                                                                                                                  | V  | 0.539879000  | 0.767656000  | -2.539427000 |                |                |
|    |                                                                                                                                  | Pt | 2.361056000  | 1.740888000  | -1.228939000 |                |                |
|    |                                                                                                                                  | Pt | 2.606305000  | -0.549533000 | -2.706691000 |                |                |
|    |                                                                                                                                  | Pt | 1.358979000  | -0.618280000 | -0.548694000 |                |                |
|    |                                                                                                                                  | H  | 0.402920000  | 0.566042000  | 1.619415000  |                |                |
|    |                                                                                                                                  | H  | -1.479836000 | -0.867918000 | 1.019565000  |                |                |
|    |                                                                                                                                  | H  | 1.806287000  | 2.881574000  | -0.311892000 |                |                |
|    |                                                                                                                                  | H  | 0.853114000  | -2.100417000 | -0.636264000 |                |                |
| 26 | TS5(b)<br>$(\nu = 260 \text{ i cm}^{-1})$<br> | C  | -1.151063000 | -0.673909000 | 0.723215000  | -1473.90454214 | -1473.94737332 |
|    |                                                                                                                                  | O  | 1.117382000  | -1.404904000 | 1.133864000  |                |                |
|    |                                                                                                                                  | N  | -1.157376000 | 0.503316000  | 1.272109000  |                |                |
|    |                                                                                                                                  | H  | -0.993613000 | 1.322321000  | 0.660697000  |                |                |
|    |                                                                                                                                  | H  | -0.842648000 | 0.593927000  | 2.226649000  |                |                |
|    |                                                                                                                                  | H  | -1.084023000 | -1.561437000 | 1.332244000  |                |                |
|    |                                                                                                                                  | V  | -0.536508000 | 0.389284000  | -2.563976000 |                |                |
|    |                                                                                                                                  | Pt | 0.655157000  | 1.982891000  | -1.127616000 |                |                |
|    |                                                                                                                                  | Pt | 1.835801000  | 0.378835000  | -2.945311000 |                |                |
|    |                                                                                                                                  | Pt | 1.100174000  | -0.698526000 | -0.775035000 |                |                |
|    |                                                                                                                                  | H  | 1.504547000  | -0.675063000 | 1.630001000  |                |                |
|    |                                                                                                                                  | H  | -1.483670000 | -0.766864000 | -0.302719000 |                |                |
|    |                                                                                                                                  | H  | -0.230355000 | 2.790634000  | -0.086371000 |                |                |
|    |                                                                                                                                  | H  | 1.266192000  | -2.180505000 | -1.177750000 |                |                |
| 27 | min6(b)<br>                                   | C  | -0.740118000 | -1.068808000 | 0.657552000  | -1473.94998454 | -1473.99309949 |
|    |                                                                                                                                  | O  | 0.845997000  | 1.108157000  | 1.315720000  |                |                |
|    |                                                                                                                                  | N  | -1.366050000 | -0.450511000 | 1.799642000  |                |                |
|    |                                                                                                                                  | H  | -2.232102000 | 0.014432000  | 1.572505000  |                |                |
|    |                                                                                                                                  | H  | -1.519361000 | -1.091448000 | 2.564699000  |                |                |
|    |                                                                                                                                  | H  | -0.162217000 | -1.933591000 | 0.993655000  |                |                |
|    |                                                                                                                                  | V  | -0.280744000 | 1.532818000  | -2.177028000 |                |                |
|    |                                                                                                                                  | Pt | 2.136615000  | 1.462016000  | -2.162646000 |                |                |
|    |                                                                                                                                  | Pt | 0.701688000  | -0.707623000 | -2.878517000 |                |                |
|    |                                                                                                                                  | Pt | 0.645042000  | 0.121486000  | -0.323854000 |                |                |
|    |                                                                                                                                  | H  | 0.111141000  | 0.818309000  | 1.881182000  |                |                |
|    |                                                                                                                                  | H  | -1.449430000 | -1.399578000 | -0.106443000 |                |                |
|    |                                                                                                                                  | H  | 2.592384000  | 2.903429000  | -1.779079000 |                |                |
|    |                                                                                                                                  | H  | 0.717155000  | -1.309089000 | -1.357387000 |                |                |
| 28 | TS6(b)<br>$(\nu = 862 \text{ i cm}^{-1})$                                                                                        | C  | -1.058072000 | -0.806687000 | 0.497793000  | -1473.91493732 | -1473.95821022 |
|    |                                                                                                                                  | O  | 0.470636000  | 1.517643000  | 0.980984000  |                |                |
|    |                                                                                                                                  | N  | -0.883228000 | -0.788660000 | 1.922462000  |                |                |
|    |                                                                                                                                  | H  | -1.766326000 | -0.733952000 | 2.412554000  |                |                |
|    |                                                                                                                                  | H  | -0.363977000 | -1.584427000 | 2.264997000  |                |                |
|    |                                                                                                                                  | H  | -1.401461000 | -1.762588000 | 0.084381000  |                |                |
|    |                                                                                                                                  | H  |              |              |              |                |                |



|    |                                                                                                                               |                                                                                                                                                                                                                                                                                                                                                                                                                                                                                                                                                                                                                    |                |                |
|----|-------------------------------------------------------------------------------------------------------------------------------|--------------------------------------------------------------------------------------------------------------------------------------------------------------------------------------------------------------------------------------------------------------------------------------------------------------------------------------------------------------------------------------------------------------------------------------------------------------------------------------------------------------------------------------------------------------------------------------------------------------------|----------------|----------------|
|    | 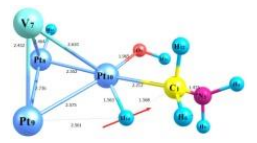                                             | V 0.018125000 0.902939000 -2.958745000<br>Pt 2.248958000 1.434557000 -2.056896000<br>Pt 1.350568000 -1.095986000 -2.578854000<br>Pt 0.612138000 0.240841000 -0.505423000<br>H 0.008418000 1.038655000 1.685161000<br>H -1.779980000 -0.047170000 0.198972000<br>H 2.320570000 2.941371000 -1.664493000<br>H 0.223630000 -1.256537000 -0.282891000                                                                                                                                                                                                                                                                  |                |                |
| 29 | min7(b)<br>                                  | C -2.121448000 -1.520302000 1.904028000<br>O 0.851893000 -0.056110000 0.954218000<br>N -1.767106000 -0.113369000 2.052504000<br>H -2.543965000 0.484047000 1.800454000<br>H -1.535654000 0.096875000 3.015666000<br>H -2.971240000 -1.840826000 2.519068000<br>V -0.092710000 1.758370000 -2.485503000<br>Pt 2.350759000 2.136656000 -2.503342000<br>Pt 1.285713000 -0.207457000 -3.122196000<br>Pt 1.331263000 0.597168000 -0.753335000<br>H -0.088462000 0.056828000 1.216177000<br>H -2.358693000 -1.723646000 0.858471000<br>H 2.648170000 3.481495000 -1.760213000<br>H -1.256835000 -2.133296000 2.161748000 | -1473.94307462 | -1473.98902095 |
| 30 | TS7<br>( $\nu=57i\text{ cm}^{-1}$ )<br>     | C -1.668729000 -1.526552000 1.530649000<br>O 1.247027000 -0.148444000 0.380859000<br>N -1.289334000 -0.129563000 1.698383000<br>H -2.089993000 0.480464000 1.596390000<br>H -0.912924000 0.029361000 2.624780000<br>H -2.386659000 -1.896331000 2.273406000<br>V 0.408883000 1.028929000 -3.117585000<br>Pt 2.502358000 2.472570000 -3.152788000<br>Pt 2.425978000 0.145344000 -4.128899000<br>Pt 1.799790000 0.913531000 -1.091998000<br>H 0.338206000 0.044765000 0.690586000<br>H -2.104987000 -1.665245000 0.539691000<br>H 2.502320000 2.397345000 -1.419853000<br>H -0.771937000 -2.146174000 1.576379000    | -1473.92064308 | -1473.96649044 |
| 31 | min8<br>                                   | C -1.754690000 -1.559916000 1.621304000<br>O 0.715716000 0.838002000 1.588750000<br>N -2.051472000 -0.143317000 1.786062000<br>H -2.867604000 0.122610000 1.250734000<br>H -2.247666000 0.072671000 2.755199000<br>H -2.566444000 -2.235943000 1.920146000<br>V 0.779277000 2.347633000 -1.981099000<br>Pt 2.057381000 0.321834000 -2.715029000<br>Pt -0.376150000 0.156677000 -2.304542000<br>Pt 1.408293000 0.715984000 -0.227059000<br>H -0.241184000 0.655647000 1.533209000<br>H -1.510724000 -1.756435000 0.574981000<br>H 2.695101000 1.291201000 0.384915000<br>H -0.866182000 -1.805716000 2.204473000    | -1473.92283821 | -1473.96922723 |
| 32 | TS 8<br>( $\nu=1026i\text{ cm}^{-1}$ )<br> | C -0.981616000 -1.799536000 1.989504000<br>O 0.543743000 1.160109000 0.505587000<br>N -1.481030000 -0.783681000 1.071257000<br>H -1.835525000 -1.207831000 0.222928000<br>H -2.248768000 -0.269664000 1.485397000<br>H -1.727561000 -2.545898000 2.288765000<br>V 2.831275000 2.476568000 -2.428883000<br>Pt 1.429983000 1.057433000 -3.962236000<br>Pt 1.917114000 3.450107000 -4.453297000<br>Pt 0.888388000 1.187814000 -1.492191000<br>H -0.154665000 0.479470000 0.659190000                                                                                                                                  | -1473.90069561 | -1473.94786959 |

|    |                                                                                               |    |              |              |              |                |                |
|----|-----------------------------------------------------------------------------------------------|----|--------------|--------------|--------------|----------------|----------------|
|    |                                                                                               | H  | -0.143192000 | -2.322800000 | 1.526698000  |                |                |
|    |                                                                                               | H  | 1.565236000  | 0.432087000  | -0.303238000 |                |                |
|    |                                                                                               | H  | -0.603382000 | -1.314177000 | 2.890518000  |                |                |
| 33 | product (b)–<br>{VPt <sub>2</sub> Pt–OH <sub>2</sub> ···NH <sub>2</sub> C<br>H <sub>3</sub> } | C  | 1.741404000  | -0.108747000 | 0.465937000  | -1473.93550851 | -1473.98023194 |
|    | 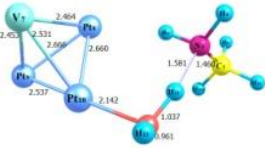             | O  | -1.065441000 | -1.290325000 | -1.079796000 |                |                |
|    |                                                                                               | N  | 0.479322000  | -0.685773000 | 0.920121000  |                |                |
|    |                                                                                               | H  | 0.625004000  | -1.299197000 | 1.712936000  |                |                |
|    |                                                                                               | H  | -0.164891000 | 0.056500000  | 1.219995000  |                |                |
|    |                                                                                               | H  | 2.271774000  | 0.445398000  | 1.246827000  |                |                |
|    |                                                                                               | V  | -3.999011000 | 0.635800000  | 1.116583000  |                |                |
|    |                                                                                               | Pt | -1.928036000 | 1.960600000  | 1.276388000  |                |                |
|    |                                                                                               | Pt | -3.826811000 | 2.444423000  | -0.530973000 |                |                |
|    |                                                                                               | Pt | -2.381561000 | 0.378068000  | -0.812753000 |                |                |
|    |                                                                                               | H  | -0.413663000 | -1.202809000 | -0.278191000 |                |                |
|    |                                                                                               | H  | 2.396449000  | -0.898489000 | 0.094193000  |                |                |
|    |                                                                                               | H  | -1.547170000 | -2.116697000 | -0.991361000 |                |                |
|    |                                                                                               | H  | 1.538378000  | 0.575215000  | -0.358921000 |                |                |
| 34 | {VPt <sub>2</sub> Pt–OH <sub>2</sub> }                                                        | V  | -0.269795000 | 0.052021000  | 1.652247000  | -1378.19547325 | -1378.23612039 |
|    |              | Pt | -0.125380000 | 1.310054000  | -0.451238000 |                |                |
|    |                                                                                               | Pt | -1.016356000 | -1.185139000 | -0.441825000 |                |                |
|    |                                                                                               | Pt | 1.423191000  | -0.803525000 | 0.082872000  |                |                |
|    |                                                                                               | O  | -3.170165000 | -1.341360000 | -0.941724000 |                |                |
|    |                                                                                               | H  | -3.255112000 | -1.626206000 | -1.858337000 |                |                |
|    |                                                                                               | H  | -3.387331000 | -0.401059000 | -0.934942000 |                |                |
| 35 | H <sub>2</sub> O                                                                              | 8  | -2.589176000 | 0.000000000  | -1.780898000 | -76.35599466   | -76.37363020   |
|    |                                                                                               | 1  | -2.589176000 | 0.761560000  | -1.197205000 |                |                |
|    |                                                                                               | 1  | -2.589176000 | -0.761560000 | -1.197205000 |                |                |
| 36 | CH <sub>3</sub> NH <sub>2</sub>                                                               | C  | -1.734606000 | -5.602295000 | 0.440637000  | -95.71332225   | -95.73624500   |
|    |             | N  | -0.711863000 | -6.623370000 | 0.592077000  |                |                |
|    |                                                                                               | H  | 0.141392000  | -6.222347000 | 0.959196000  |                |                |
|    |                                                                                               | H  | -1.009178000 | -7.331239000 | 1.250987000  |                |                |
|    |                                                                                               | H  | -2.641020000 | -6.055111000 | 0.032359000  |                |                |
|    |                                                                                               | H  | -2.011421000 | -5.072060000 | 1.363596000  |                |                |
|    |                                                                                               | H  | -1.397483000 | -4.856917000 | -0.283217000 |                |                |
